# Supplementary material for: Novel molecular subgroups for clinical classification and outcome prediction in childhood medulloblastoma: a cohort study
Source: PubMed Central journal article supplement (PMC5489698; doi:10.1016/s1470-2045(17)30243-7), 2017-07
Supplement: mmc1.pdf [file mmc1.pdf]

# THE LANCET Oncology

## Supplementary appendix

This appendix formed part of the original submission and has been peer reviewed. We post it as supplied by the authors.

Supplement to: Schwalbe EC, Lindsey JC, Nakjang S, et al. Novel molecular subgroups for clinical classification and outcome prediction in childhood medulloblastoma: a cohort study. *Lancet Oncol* 2017; published online May 22. [http://dx.doi.org/10.1016/S1470-2045\(17\)30243-7](http://dx.doi.org/10.1016/S1470-2045(17)30243-7).

**Appendix: Novel molecular subgroups for clinical classification and outcome prediction in childhood medulloblastoma: a cohort study.**

**Table of Contents**

|                                              |   |
|----------------------------------------------|---|
| Supplementary Methods.....                   | 2 |
| Methylation array processing.....            | 2 |
| Subgroup identification and validation ..... | 2 |
| Subgroup characterisation.....               | 3 |
| Transcriptome analysis .....                 | 4 |
| Mutational analysis .....                    | 4 |
| Genomic copy number specific analysis.....   | 4 |
| Survival analysis .....                      | 4 |
| Supplementary Methods References .....       | 7 |
| Supplementary Figures and Tables.....        | 9 |

## Supplementary Methods

### Methylation array processing

DNA extracts from a cohort of 428 centrally-reviewed, clinically-annotated primary medulloblastomas from patients aged 0-16.0 years at diagnosis, collected predominantly from UK Children's Cancer and Leukaemia Group (CCLG) (n=366/428; 86%), alongside samples from the UKCCSG-SIOP-PNET3 clinical trial (n=27/428; 6%) and from collaborating European Institutions in Budapest (n=20/428; 5%) and Warsaw (n=15/428; 4%) were run on Illumina 450k DNA methylation microarrays. The cohort consisted of 302 (71%) medulloblastomas extracted from fresh-frozen material, and 126 (29%) from formalin-fixed, paraffin-embedded (FFPE) tumours. This cohort was enriched for infant (aged <3 at diagnosis) cases (n=101/428 (24%)), since we hypothesised that the methylome of infant disease was substantially different from childhood disease. Cohort demographics of this centrally-reviewed and comprehensively clinically annotated cohort are summarised in Table 1. Of note, 87 cases from this cohort overlapped with our previous study which identified 4 methylation-dependent subgroups of medulloblastoma using low-resolution methylation arrays<sup>1</sup>.

Methylation array processing, normalisation and quality control checks were implemented using the R package minfi<sup>2</sup>. We employed conservative quality control measures to filter out poorly performing and potentially confounding loci: Probes mapping to the sex chromosomes, genotyping probes, probes aligning to more than one place in the genome, and probes which had a SNP with a minor allele frequency of 5% or greater within 50bp of the interrogated site were removed. Probes with a detection p value > 0.05 in more than 5% of samples were removed<sup>3</sup>. Remaining probes with a detection p value > 0.05 were imputed using k-nearest neighbour imputation, as previously described<sup>4</sup>. Samples were checked for potential duplication by examining pairwise correlations of 65 genotyping probes.

Subsequently, using 18 normal cerebellum samples as controls (consisting of 3 foetal, 10 infant (newborn-25 months) and 3 adult samples (43-67 years), with 2 samples of unknown age; all samples consisted of post-mortem material from patients who died from non-neoplastic events), copy number profiles were generated from 450k methylation array probe intensity values using the R package conumee (<https://www.bioconductor.org/packages/release/bioc/html/conumee.html>; date accessed Mar 2nd, 2017), and arm-level genomic copy-number gain and loss was scored. Using copy number information derived from gold-standard Affymetrix SNP6.0 arrays, cutoffs for calling chromosomal arm gain (log ratio > 0.12) and loss (log ratio < -0.22) were empirically derived by using confirmed monosomy of chromosome 6 in MBWNT tumours as a marker of chromosomal loss, and confirmed gain of chromosome 7, the most commonly observed chromosomal gain in our cohort, as a marker of chromosomal gain. Samples were scored as having arm gain or loss if more than 50% of the arm was gained or lost according to the empirically determined cutoffs.

### Subgroup identification and validation

Consensus bootstrapped non-negative matrix factorisation (NMF) clustering was performed on the 10,000 most variably methylated probes (identified by measuring the standard deviation of M scores<sup>5</sup>), as previously described<sup>1</sup>. Briefly, we employed NMF to identify from 3 to 10 metagenes from repeated sampling (n=250) of

80% of the dataset, followed by metagene projection onto the entire dataset), which were then clustered using k-means into 3 to 10 clusters.

Metagenes are a single score that reflects the methylation status of multiple CpG loci, and can be thought of as being representative of the major biological effects within the dataset. Metagenes as derived by NMF provide a quantitative measurement of multiple distinct "real-world" (i.e. non-abstract) biological signatures, which in this instance primarily describe the major differences amongst the described sub-groups. A single score represents the weighted contribution of multiple CpGs, but it does not follow that all CpGs must contribute equally to a metagene nor that each contribution must be hypo- or hyper methylated; directionality is not implied but may be elucidated post-hoc.

Cluster stability measures (Cohen's kappa, average silhouette scores) were assessed to identify optimal combinations of metagenes and resultant clusters. Samples assigned to the same cluster in fewer than 80% of replicates were classified as not classifiable (NC). After assignment of sample cluster, subgroups were visualised by applying *t*-Distributed Stochastic Neighbour Embedding (t-SNE) dimensionality reduction to identify three components, using the R package Rtsne (<https://cran.r-project.org/web/packages/Rtsne/index.html>; date accessed Mar 2<sup>nd</sup>, 2017). The quality of the identified cluster subgroups was further assessed using silhouette plots<sup>6</sup>. In order to validate the observed metagene patterns and identified subgroups, we projected metagenes<sup>7</sup> from a non-overlapping cohort of 276 medulloblastomas (GSE54880<sup>8</sup>) run on the 450k array, and classified them into the 7 primary subgroups using an optimised support vector machine (SVM) learning classifier that was trained on the 428 medulloblastoma primary cohort.

### **Subgroup characterisation**

Histopathological disease subtypes were assessed by central review from three experienced neuro-pathologists, according to current WHO criteria<sup>9</sup>. Where central review was unavailable, local pathological diagnoses were used. Chang's criteria were used to assign metastatic stage<sup>10</sup>. Since imaging was not available in many cases, M-disease was defined as M0, M1 or M0/1 disease, and M+ disease as M2+. Tumours were classed as R+ if their residuum following excision exceeded 1.5cm<sup>2</sup>.

Amplification of the *MYC* and *MYCN* oncogenes was assessed by iFISH (interphase fluorescent *in situ* hybridisation), and, where not available, multiplex ligation dependent probe amplification (MLPA) and/or estimation of copy number from methylation array locus intensities. Mutations in exons 4 to 9 of *TP53* and in the *TERT* promoter were assessed as previously<sup>11,12</sup>.

Subgroup-specific differentially methylated CpG loci were identified using the R package limma<sup>13</sup>. In order to identify differentially methylated regions (DMRs), gene-proximal DMRs, defined as being within 10kb of a gene, were identified using the R package DMRcate<sup>14</sup>. In order to derive a single measure of methylation from these DMRs, the maximally changed region was identified by initially identifying the most differential CpG locus within each DMR, then expanding the region to include at least two CpG loci, whilst maximising the average methylation difference, continuing to expand the maximally changed region until the average change in methylation started to decrease. The reported methylation for each DMR was therefore the average of the maximally changed region. In order to investigate the characteristics of differentially methylated genes, the R package missMethyl<sup>15</sup> was used to identify KEGG pathway enrichments from lists of subgroup-specific hypo-



methylated loci, with a methylation beta difference  $> 0.3$ , whilst correcting for the potential bias conferred by having different numbers of probes mapping to different genes. Significant pathway enrichments are summarised in supplementary Table 2. Subgroup-specific age-differences between the newly-characterised nonMB<sub>WNT</sub>/nonMB<sub>SHH</sub> medulloblastoma subgroups were identified using ANOVA.

### **Transcriptome analysis**

Transcriptome sequencing was available for 190/428 primary medulloblastomas in the methylation array cohort. cDNA libraries were prepared using TruSeq RNA Library Kit and 100bp paired-end sequencing was performed on an Illumina HiSeq2500 to produce ~90M reads per sample. Samples were quality controlled using Fastqc, aligned to hg19 using RNA-star<sup>16</sup> and gene expression quantified by counting reads mapped to the Gencodev17 library using HT-Seq (Union mode)<sup>17</sup>. Variance stabilising transformation, normalisation to overall library size, and differential expression were performed using DESeq2<sup>18</sup>. Goseq (Wallenius approximation option)<sup>19</sup> was used for pathway enrichment analysis on the differentially expressed gene set, whilst correcting for selection bias, *i.e.* genes with a higher number of reads (more highly expressed or a longer transcript) are more likely to be detected as differentially expressed.

### **Mutational analysis**

To subgroup additional MB<sub>SHH</sub> cases from an external dataset for which genome-sequencing data was available<sup>20</sup>, the likelihood of belonging to either MB<sub>SHH-Child</sub> or MB<sub>SHH-Infant</sub>, given the age at diagnosis, was assessed by modelling the age distribution of the MB<sub>SHH</sub> subgroups in our cohort and applying it to the external dataset. Samples from the external dataset were assigned to either subgroup if their odds-ratio of membership exceeded 3:1.

### **Genomic copy number specific analysis**

Cytogenetic changes were assessed for their association with subgroup using chi-squared tests. Changes were reported if present in at least 10% of one or more subgroups and with a subgroup enrichment with adjusted  $p < 0.05$ .

### **Survival analysis**

We performed Cox modelling only on patients who have received comparable treatment, *i.e.* limiting cohorts to patients aged from 3-16 years, who received maximal surgical resection and cranio-spinal irradiation with curative intent, these being the most important factors affecting prognosis. Whilst there has been some heterogeneity of treatment, all received cranio-spinal radiotherapy with a dose that was appropriate to their clinical risk factors (*i.e.* M+ disease, LCA) and the chemotherapy that was used was standard for the day (*e.g.* SJMB, Milan, POG 9031 for high risk) or for standard risk disease (*e.g.* CCNU, Cisplatin and Vincristine (Packer) or PNET 3).

Established risk factors for the MB<sub>SHH-Child</sub> subgroup were assessed in an expanded MB<sub>SHH</sub> cohort (<16 years old at diagnosis with cranio-spinal irradiation and maximal surgical resection), augmenting samples classed as MB<sub>SHH-Child</sub> by methylation array ( $n=24$ ) with MB<sub>SHH</sub> samples for which confirmatory 450k methylation microarray-based subgrouping was unavailable. As before, MB<sub>SHH</sub> samples were added to this cohort if their odds ratio of membership of the MB<sub>SHH-Child</sub> subgroup based on their age at diagnosis exceeded 3:1 ( $n=31$ ). Since the expanded MB<sub>SHH-Child</sub> cohort included samples for which cytogenetic changes were unavailable, we tested currently understood SHH-specific risk markers (*MYCN* amplification, *TP53* mutation, *TERT* mutation) and

clinical parameters (metastatic stage, residual disease, LCA pathology, gender) in univariate and multivariate Cox models in this cohort. All potential variables were tested for proportionality of hazards in univariate and multivariate models.

For the non-MB<sub>SHH</sub>/non-MB<sub>WNT</sub> medulloblastoma subgroups, the newly discovered high-risk metagene and genomic copy-number changes were assessed in univariate and cross-validated Cox proportional hazard survival models on childhood cohorts (aged 3·0-16·0 years) that had uniformly received cranio-spinal irradiation. Genomic copy-number changes were filtered before being considered as prognostic markers: Putative survival markers had to be (i) observed in at least 10% of samples within the subgroup of interest, and (ii) be significant (unadjusted  $p < 0.05$ ) in log-rank tests of survival. Subsequently, all potential variables were tested for proportionality of hazards in univariate and multivariate models. *MYC* amplification showed a non-proportionality of hazards due to its differential, subgroup-specific disease outcomes that disappeared when MB<sub>Grp3</sub> and MB<sub>Grp4</sub> medulloblastomas were considered separately (*MYC* amplified MB<sub>Grp4</sub> did not have the dismal outcomes observed in *MYC* amplified MB<sub>Grp3</sub> tumours). In addition to the cytogenetic factors defined above, the prognostic potential of established disease-wide features (metastatic disease, LCA pathology, residual disease, gender, *MYC/MYCN* amplification, i17q), as well as other molecular features (membership of high-risk methylomic group, defined by metagene V1, membership of MB<sub>Grp3</sub>) was tested where appropriate.

For all multivariate survival modelling, missing data were classified as ‘missing at random’ and samples with missing data were therefore removed from the analysis. Subsequently, prognostic markers were identified in semi-supervised multivariate survival models by performing 100 rounds of 10 fold-cross-validation. In each round of cross-validation, the predictive performance of each factor was assessed by calculating area under the curve (AUC) from survival-dependent Receiver-Operating Characteristic (ROC) curves at 5 years in the left-out fold using the R package risksetROC (<https://cran.r-project.org/web/packages/risksetROC/index.html>; date accessed Mar 2<sup>nd</sup>, 2017), and the mean AUC from the 10 folds was subsequently calculated. A final mean AUC was calculated from the 100 repetitions. Markers were entered into the model if a cross-validated increase in AUC was observed. Limits for the total number of included markers were dependent upon the sample size of the discovery cohort. Cox proportional hazards models were constructed for the identified risk markers in each cohort and reported in Tables 2,3 and Supplementary Figure 7.

To identify clinically relevant risk stratification schemes, the cross-validated, multivariate Cox models were used to predict survival at 5 years; patients were stratified according to their predicted survival, dividing predicted outcomes into two or three risk groups as appropriate, and their constituent risk factor profiles were used to derive pragmatic schemes for assigning patient risk (Supplementary Figure 4B, Supplementary Figure 6, Supplementary Figure 7B,F).

The performance of the proposed risk stratification schemes was assessed by measuring AUC at 5 years and comparing against the SIOP-PNET5 non-MB<sub>WNT</sub> stratification scheme (high risk: Positive for any combination of LCA pathology, metastatic disease, residual disease and *MYC(N)* amplification; standard risk: Negative for the above markers) and a recently described subgroup-directed cytogenetic stratification scheme<sup>21</sup>.

All bioinformatic and statistical analyses were performed using R (v3.2.3). Risk stratification was performed using progression-free survival (PFS) times, defined as time elapsed from diagnosis to first event, which was tumour recurrence or progression.

## Supplementary Methods References

- 1 Schwalbe EC, Williamson D, Lindsey JC, *et al.* DNA methylation profiling of medulloblastoma allows robust subclassification and improved outcome prediction using formalin-fixed biopsies. *Acta Neuropathol* 2013; **125**: 359–71.
- 2 Aryee MJ, Jaffe AE, Corrada-Bravo H, *et al.* Minfi: a flexible and comprehensive Bioconductor package for the analysis of Infinium DNA methylation microarrays. *Bioinformatics* 2014; **30**: 1363–9.
- 3 Touleimat N, Tost J. Complete pipeline for Infinium(®) Human Methylation 450K BeadChip data processing using subset quantile normalization for accurate DNA methylation estimation. *Epigenomics* 2012; **4**: 325–41.
- 4 Nordlund J, Bäcklin CL, Wahlberg P, *et al.* Genome-wide signatures of differential DNA methylation in pediatric acute lymphoblastic leukemia. *Genome Biol* 2013; **14**: r105.
- 5 Du P, Zhang X, Huang C-C, *et al.* Comparison of Beta-value and M-value methods for quantifying methylation levels by microarray analysis. *BMC Bioinformatics* 2010; **11**: 587.
- 6 Rousseeuw PJ. Silhouettes: A graphical aid to the interpretation and validation of cluster analysis. *Journal of Computational and Applied Mathematics* 1987; **20**: 53–65.
- 7 Tamayo P, Scanfeld D, Ebert BL, Gillette MA, Roberts CWM, Mesirov JP. Metagene projection for cross-platform, cross-species characterization of global transcriptional states. *Proc Natl Acad Sci USA* 2007; **104**: 5959–64.
- 8 Hovestadt V, Remke M, Kool M, *et al.* Robust molecular subgrouping and copy-number profiling of medulloblastoma from small amounts of archival tumour material using high-density DNA methylation arrays. *Acta Neuropathol* 2013; **125**: 913–6.
- 9 Louis DN, Perry A, Reifenberger G, *et al.* The 2016 World Health Organization Classification of Tumors of the Central Nervous System: a summary. *Acta Neuropathol* 2016; **131**: 803–20.
- 10 Chang CH, Housepian EM, Herbert C. An operative staging system and a megavoltage radiotherapeutic technic for cerebellar medulloblastomas. *Radiology* 1969; **93**: 1351–9.
- 11 Lindsey JC, Schwalbe EC, Potluri S, Bailey S, Williamson D, Clifford SC. TERT promoter mutation and aberrant hypermethylation are associated with elevated expression in medulloblastoma and characterise the majority of non-infant SHH subgroup tumours. *Acta Neuropathol* 2014; **127**: 307–9.
- 12 Lindsey JC, Hill RM, Megahed H, *et al.* TP53 mutations in favorable-risk Wnt/Wingless-subtype medulloblastomas. *J Clin Oncol* 2011; **29**: e344–6–authorreplye347–8.
- 13 Ritchie ME, Phipson B, Wu D, *et al.* limma powers differential expression analyses for RNA-sequencing and microarray studies. *Nucleic Acids Res* 2015; **43**: e47–7.
- 14 Peters TJ, Buckley MJ, Statham AL, *et al.* De novo identification of differentially methylated regions in the human genome. *Epigenetics Chromatin* 2015; **8**: 6.
- 15 Phipson B, Maksimovic J, Oshlack A. missMethyl: an R package for analyzing data from Illumina's HumanMethylation450 platform. *Bioinformatics* 2016; **32**: 286–8.
- 16 Dobin A, Davis CA, Schlesinger F, *et al.* STAR: ultrafast universal RNA-seq aligner. *Bioinformatics* 2013; **29**: 15–21.
- 17 Anders S, Pyl PT, Huber W. HTSeq--a Python framework to work with high-throughput sequencing data. *Bioinformatics* 2015; **31**: 166–9.
- 18 Love MI, Huber W, Anders S. Moderated estimation of fold change and dispersion for RNA-seq data with DESeq2. *Genome Biol* 2014; **15**: 550.

- 19 Young MD, Wakefield MJ, Smyth GK, Oshlack A. Gene ontology analysis for RNA-seq: accounting for selection bias. *Genome Biol* 2010; **11**: R14.
- 20 Kool M, Jones DTW, Jäger N, *et al.* Genome sequencing of SHH medulloblastoma predicts genotype-related response to smoothed inhibition. *Cancer Cell* 2014; **25**: 393–405.
- 21 Shih DJH, Northcott PA, Remke M, *et al.* Cytogenetic prognostication within medulloblastoma subgroups. *J Clin Oncol* 2014; **32**: 886–96.

## Supplementary Figures and Tables

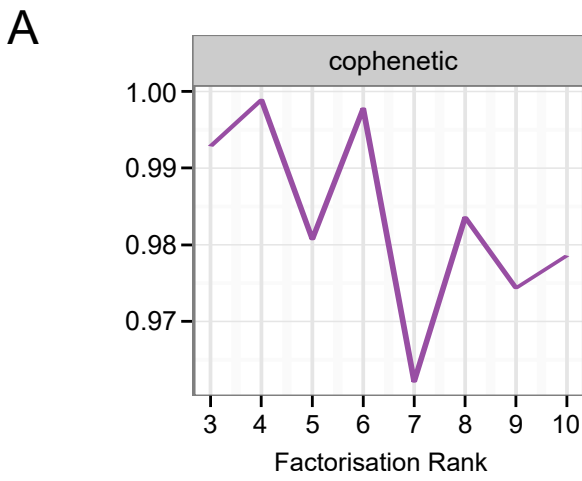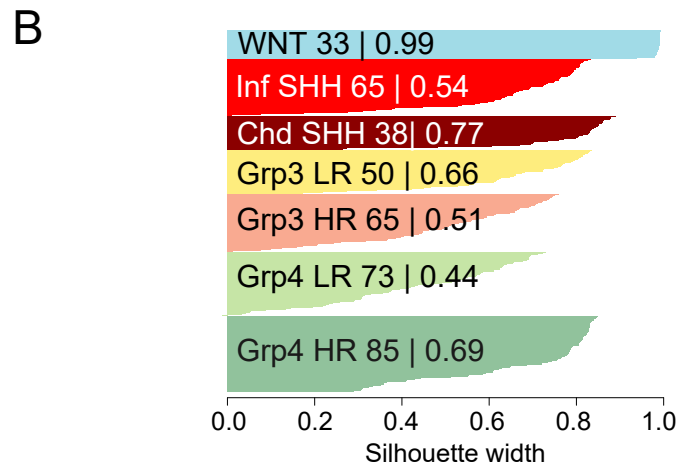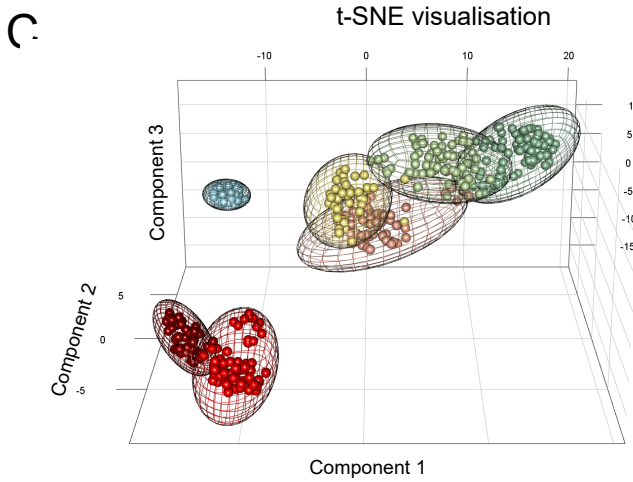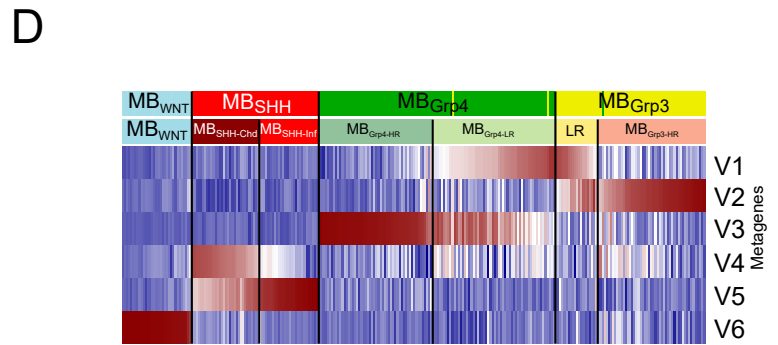

**E**

Original classification - Hovestadt *et al.* call

|            | WNT | SHH | Grp3 | Grp4 |
|------------|-----|-----|------|------|
| WNT        | 33  | 0   | 0    | 0    |
| SHH-Infant | 0   | 28  | 0    | 0    |
| SHH-Child  | 0   | 32  | 0    | 0    |
| Grp3-LR    | 0   | 0   | 20   | 0    |
| Grp3-HR    | 0   | 0   | 50   | 1    |
| Grp4-LR    | 0   | 0   | 2    | 56   |
| Grp4-HR    | 0   | 0   | 0    | 54   |

7 group classification - this study

**F**

704 MB group classification

|            | WNT | SHH-Infant | SHH-Child | Grp3-LR | Grp3-HR | Grp4-LR | Grp4-HR |
|------------|-----|------------|-----------|---------|---------|---------|---------|
| WNT        | 33  | 0          | 0         | 0       | 0       | 0       | 0       |
| SHH-Infant | 0   | 65         | 0         | 0       | 0       | 0       | 0       |
| SHH-Child  | 0   | 0          | 38        | 0       | 0       | 0       | 0       |
| Grp3-LR    | 0   | 0          | 0         | 50      | 0       | 0       | 0       |
| Grp3-HR    | 0   | 0          | 0         | 0       | 65      | 0       | 0       |
| Grp4-LR    | 0   | 0          | 0         | 0       | 0       | 73      | 0       |
| Grp4-HR    | 0   | 0          | 0         | 0       | 0       | 0       | 85      |

428 MB group classification

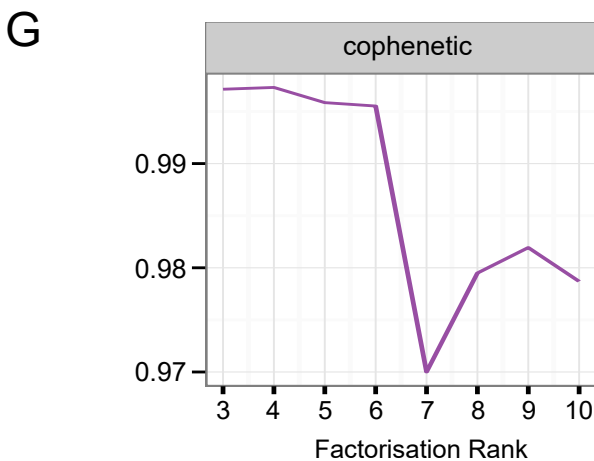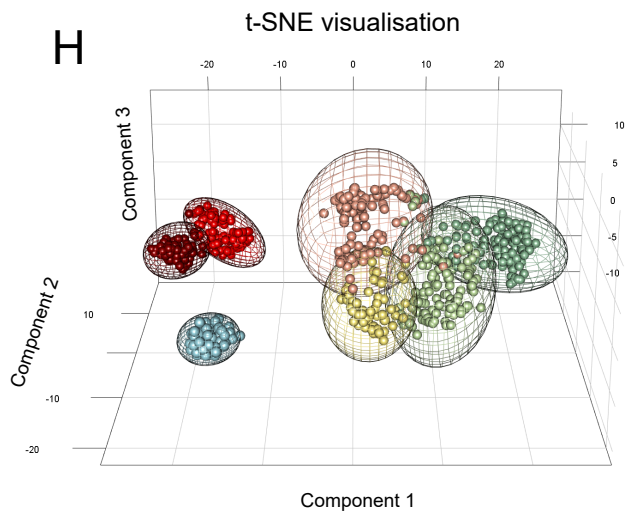

**Supplementary Figure 1. Medulloblastoma comprises 7 reproducible, methylation-dependent subgroups.**

**A.** Cophenetic coefficient plot for factorisation ranks from 3 to 10 from consensus NMF clustering identifies 6 metagenes as optimal. **B.** Silhouette plot demonstrates robust subgroup assignment. The number of members and average silhouette width of each subgroup is shown. **C.** t-SNE visualisation of 10,000 most variably methylated loci. Tumours are plotted as spheres, coloured by their NMF-based subgroup assignment (blue – MB<sub>WNT</sub>; dark red – MB<sub>SHH-Child</sub>; red MB<sub>SHH-Infant</sub>; darker green – MB<sub>Grp4-HR</sub>; green – MB<sub>Grp4-LR</sub>; peach – MB<sub>Grp3-HR</sub>; yellow – MB<sub>Grp3-LR</sub>). Covariance spheroids were plotted across 95% confidence intervals. **D.** Validation of novel subgroups (second row)<sup>8</sup> in an independent cohort of 276 medulloblastomas. NMF metagene projection recapitulated previously identified medulloblastoma subgroups, which were congruent with their original subgroup assignment (first row)<sup>8</sup>. **E.** Validation of identified subgroups in an independent medulloblastoma 450k DNA methylation array dataset. Confusion matrix shows original subgroup calls from Hovestadt *et al.*'s dataset (GSE54880) in columns<sup>8</sup>. Subgroup calls assigned by an SVM classifier are shown in rows for the 7 subgroups identified in this study. **F.** Subgroup assignments remain stable when clustering with discovery (n=428) or combined discovery and validation cohorts (n=704). Table shows consensus subgroup assignments in discovery cohort compared with subgroup assignments of discovery cohort non-NC tumours (n=409) when clustered as part of the combined cohort. **G.** Subgroup discovery in the combined discovery and validation cohort (n=704) does not identify additional subgroup heterogeneity. Cophenetic coefficients are shown for factorisation ranks from 3 to 10. **H.** t-SNE visualisation of 10,000 most variably methylated loci for the combined cohort. Tumours are plotted as spheres and coloured by NMF-based subgroup assignment (blue – MB<sub>WNT</sub>; dark red – MB<sub>SHH-Child</sub>; red – MB<sub>SHH-Infant</sub>; darker green – MB<sub>Grp4-HR</sub>; green – MB<sub>Grp4-LR</sub>; peach – MB<sub>Grp3-HR</sub>; yellow – MB<sub>Grp3-LR</sub>). Covariance spheroids were plotted across 95% confidence intervals.



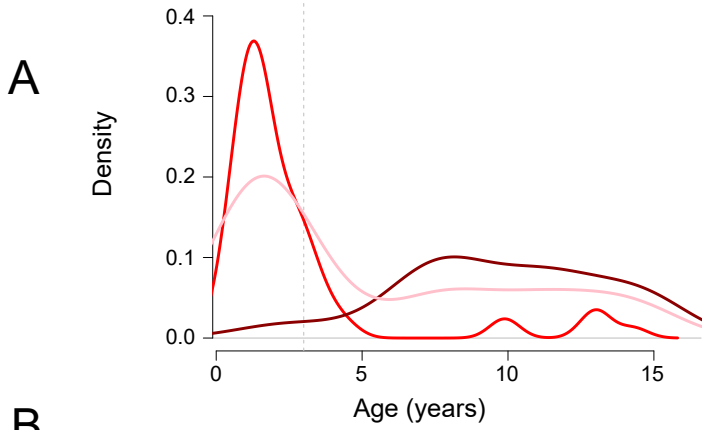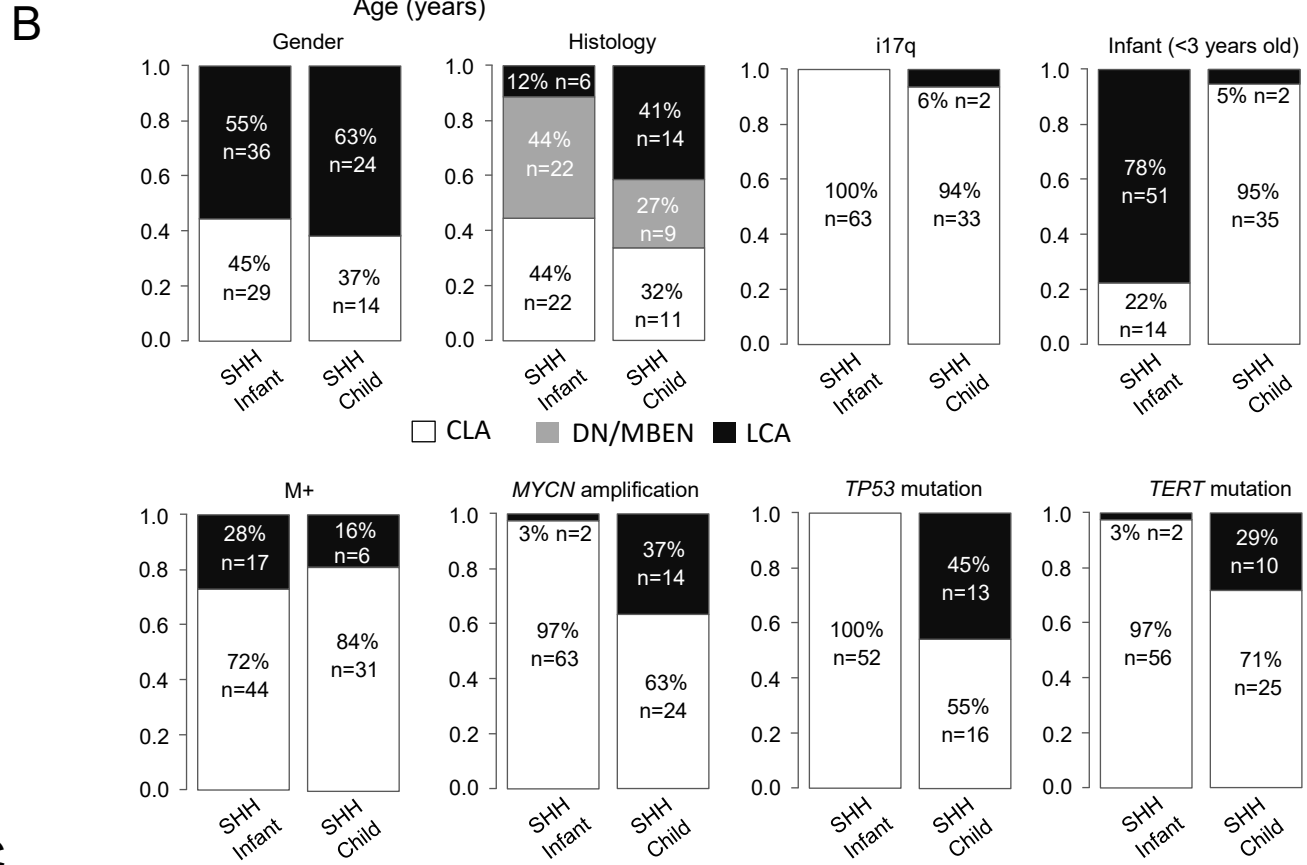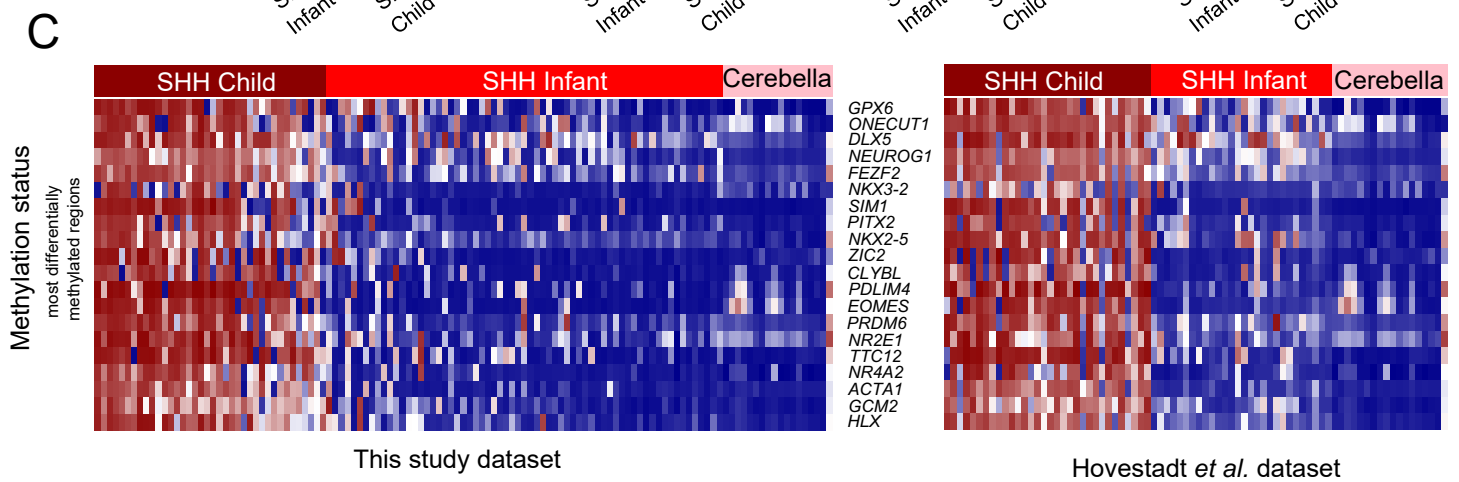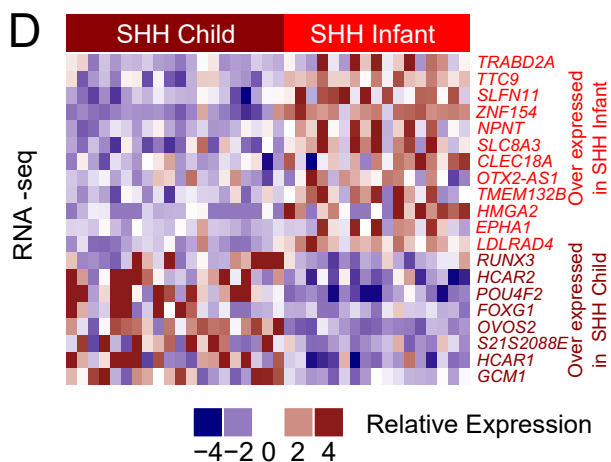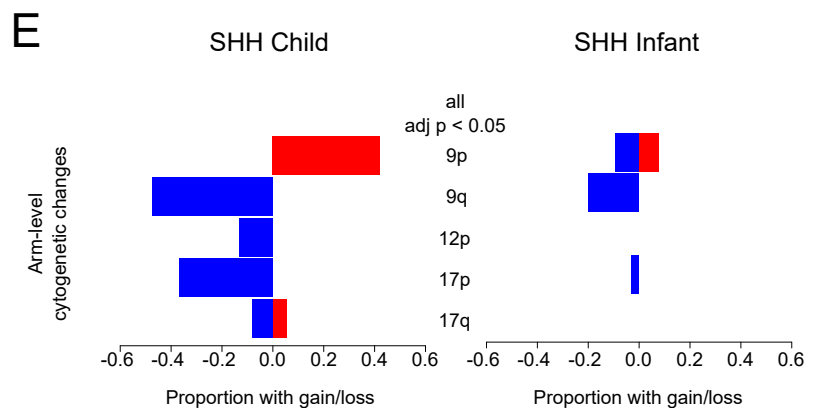

**Supplementary Figure 2. Characterisation and molecular validation of identified MB<sub>SHH-Infant</sub> and MB<sub>SHH-Child</sub> subgroups.** **A.** Density plots of age distributions are shown for individual MB<sub>SHH-Infant</sub> and MB<sub>SHH-Child</sub> subgroups (red and dark red respectively), alongside a single MB<sub>SHH</sub> entity, shown in pink. **B.** Incidences of established clinico-pathological and molecular correlates based on available data are shown as stacked percentage bar plots. **C.** Top 20 gene-proximal differentially methylated regions (DMRs defined by the average methylation of maximally changed gene-proximal regions identified using the R package DMRcate) and methylation of 18 normal cerebella are shown. Recapitulation of identified DMR changes in an independent validation cohort<sup>8</sup> is shown on right-hand side. **D.** Identification of MB<sub>SHH</sub> subgroup differentially expressed genes. Heatmap displays Z scores from VSD-transformed RNA-seq data of MB<sub>SHH</sub> tumours. Genes over-expressed in MB<sub>SHH-Infant</sub> disease are labelled red; genes over-expressed in MB<sub>SHH-Child</sub> disease are labelled dark red. **E.** MB<sub>SHH</sub> subgroups show differential cytogenetic correlates. Incidence of arm-level chromosomal gains (red) / losses (blue) significantly different between childhood and infant SHH subgroups (adjusted  $p < 0.05$ ).

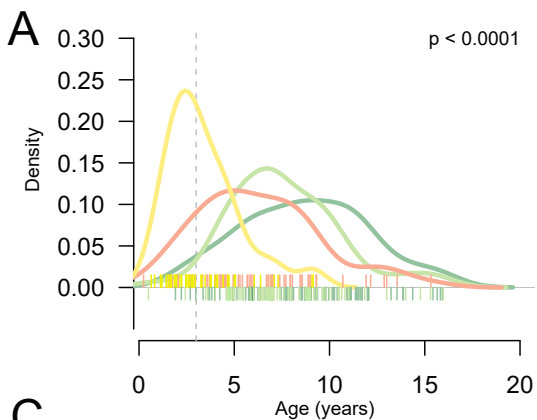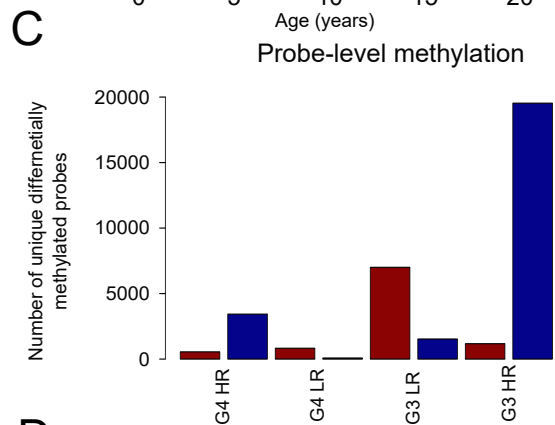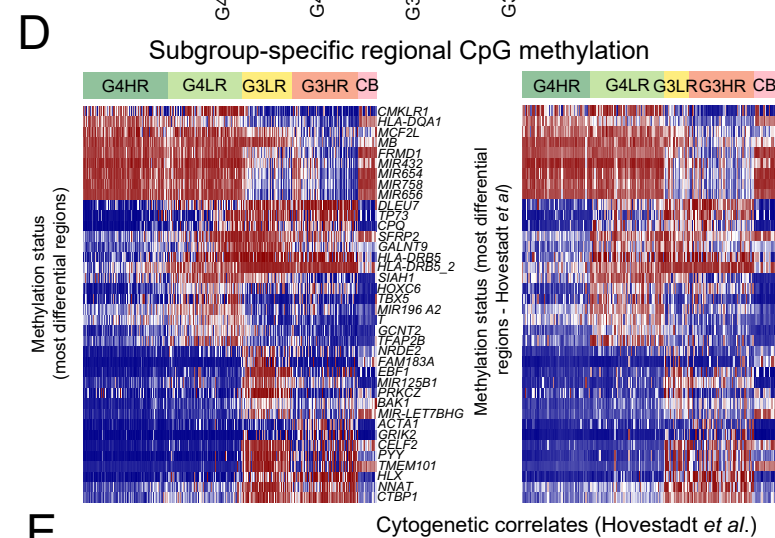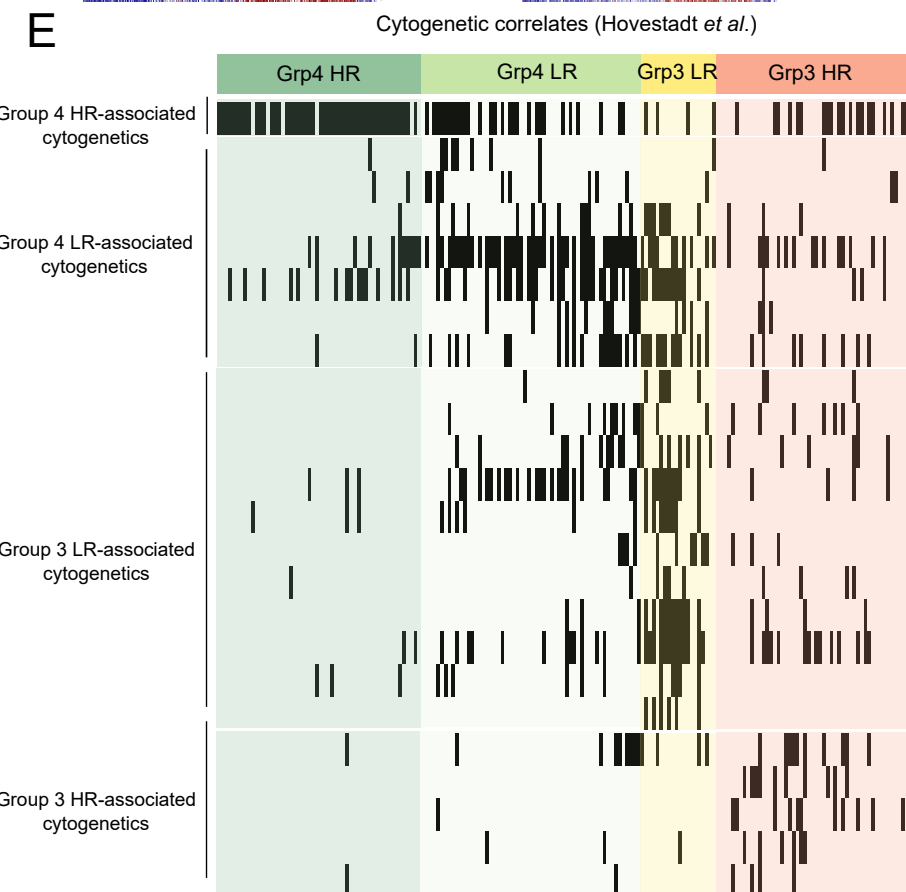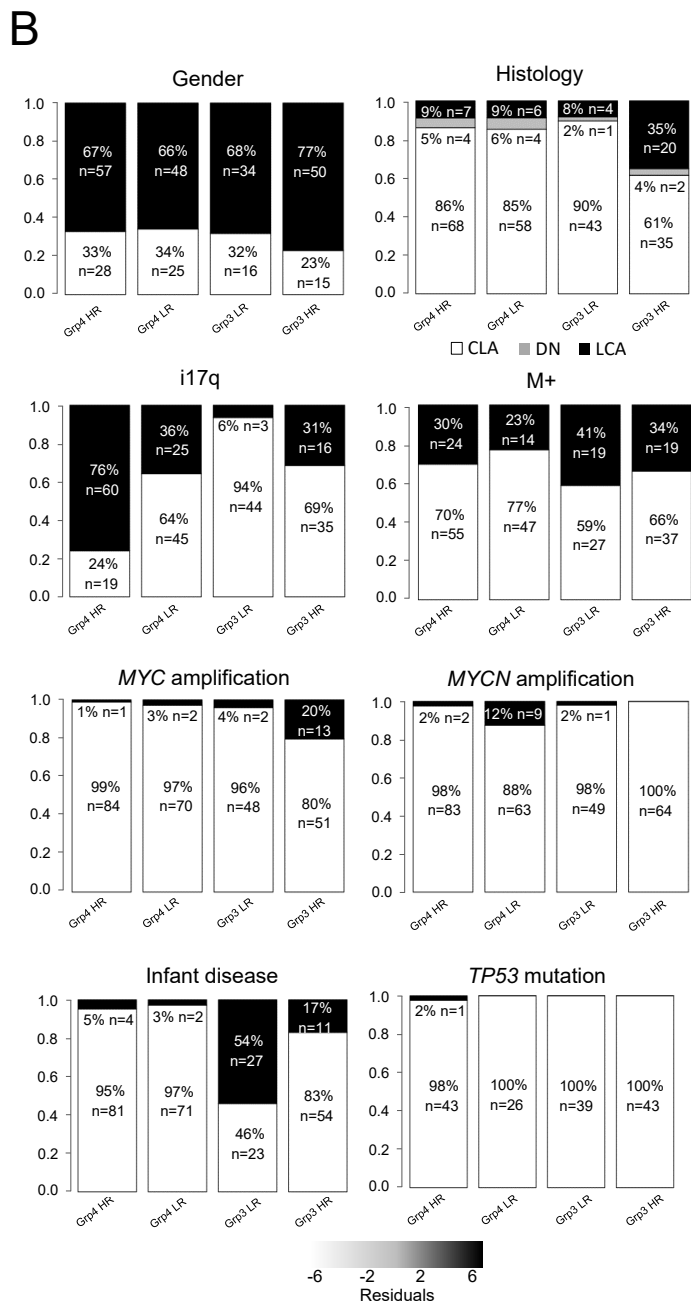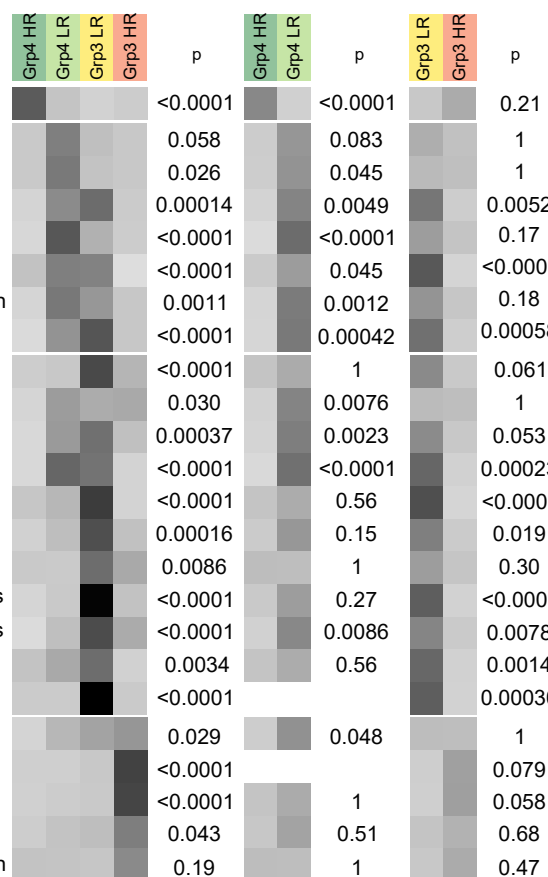

**Supplementary Figure 3. Characterisation and molecular validation of non-MB<sub>SHH</sub>/non-MB<sub>WNT</sub> subgroups.**

**A.** MB<sub>Grp3-LR</sub> and MB<sub>Grp3-HR</sub> (yellow and peach respectively) subgroups show earlier age of diagnosis than MB<sub>Grp4-LR</sub> and MB<sub>Grp4-HR</sub> subgroups (green and darker green respectively). Individual patient ages at diagnosis are shown as ticks along the X axis. **A.** Incidences of clinico-pathological and molecular correlates based on available data are shown as stacked percentage bar plots. **C.** MB<sub>Grp3-HR</sub> tumours are enriched for hypo-methylation events compared to other subgroups. Bar plot shows the number of subgroup-specific hyper- (red bars) and hypo-methylation (blue bars) events across the four non-MB<sub>SHH</sub>/non-MB<sub>WNT</sub> medulloblastoma subgroups. **D.** Top 10 gene-proximal differentially methylated regions (DMRs) for each non-MB<sub>SHH</sub>/non-MB<sub>WNT</sub> subgroup and methylation of 18 normal cerebella are shown (only 8 DMRs reached significance and magnitude of methylation change cutoffs for MB<sub>Grp4-LR</sub> comparison) and their recapitulation of identified non-MB<sub>SHH</sub>/non-MB<sub>WNT</sub> subgroup specific DMR changes in an independent validation cohort<sup>8</sup>, shown on right hand side. **E.** Significant cytogenetic changes observed in the discovery cohort and their incidence in validation cohort. Residuals from  $\chi^2$  tests indicate where subgroup-enrichment has occurred (dark greys indicate strong relationships), comparing across all subgroups, then within MB<sub>Grp3</sub> and MB<sub>Grp4</sub> individually. Scale bar for residuals is shown.

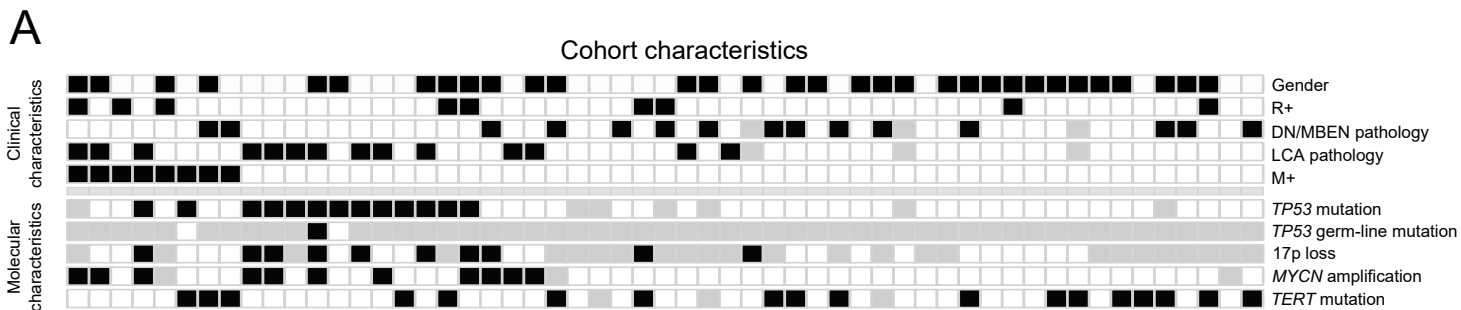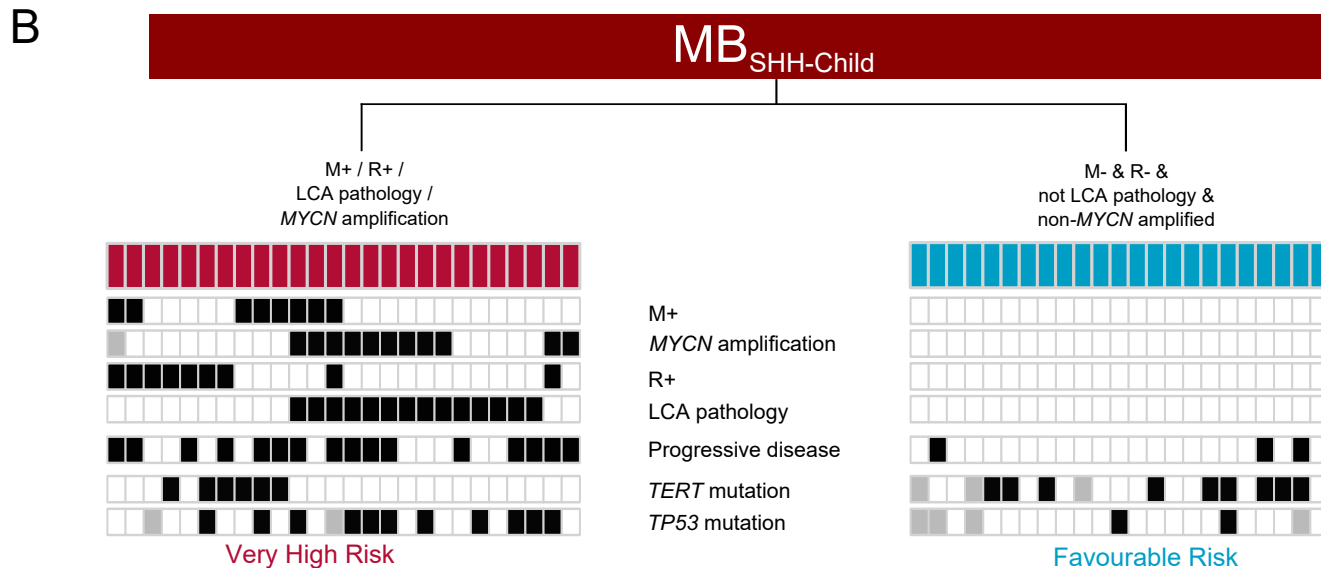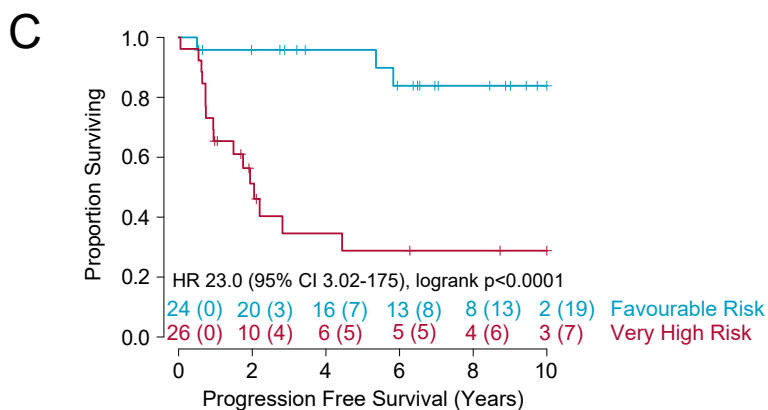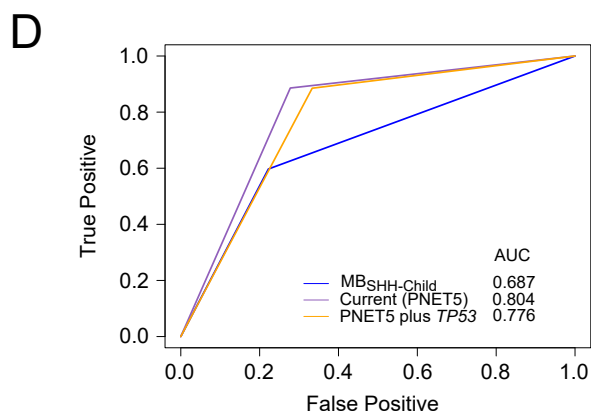

**Supplementary Figure 4. Risk stratification of MB<sub>SHH-Child</sub> medulloblastoma.** **A.** Age-dependency of MB<sub>SHH</sub> subgroups enabled expansion of CSI-irradiated MB<sub>SHH-Child</sub> cohort for survival analysis (total n=55). Cohort characteristics are shown. Missing data are shown grey. Abbreviations used: R+, residual disease; DN/MBEN, desmoplastic/nodular, medulloblastoma with extensive nodularity; LCA, large-cell/anaplastic; M+, metastatic disease. **B.** The non-MB<sub>WNT</sub> SIOP-PNET5-MB survival model for risk stratification of MB<sub>SHH-Child</sub> (positive for one or more of LCA pathology / M+ disease / R+ disease / *MYC(N)* amplification are high risk, absent for all high risk features, standard risk), in addition to *TERT* and *TP53* mutation status, shown for information. Positivity for a marker is shown black; missing data are shown grey. **C.** Progression-free survival plots for identified risk subgroups shown in C. At risk table (number censored in parentheses) is shown. **D.** Time-dependent ROC curves at 5 years are shown for non-MB<sub>WNT</sub> SIOP-PNET5-MB clinical trial stratification, in addition to non-MB<sub>WNT</sub> SIOP-PNET5-MB stratification, plus *TP53* mutation as a poor risk factor, and the empirically determined scheme shown in Table 2 (positive for one or more of *MYCN* amplification, M+ disease or *TP53* mutation).

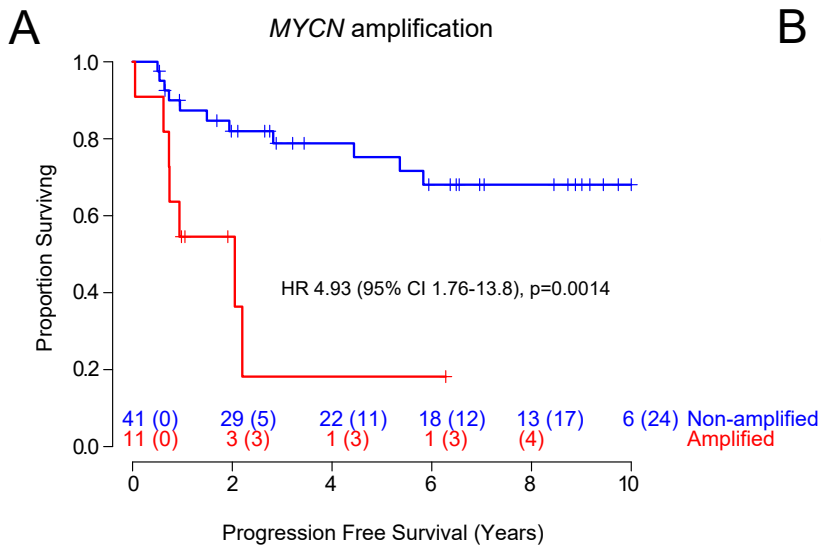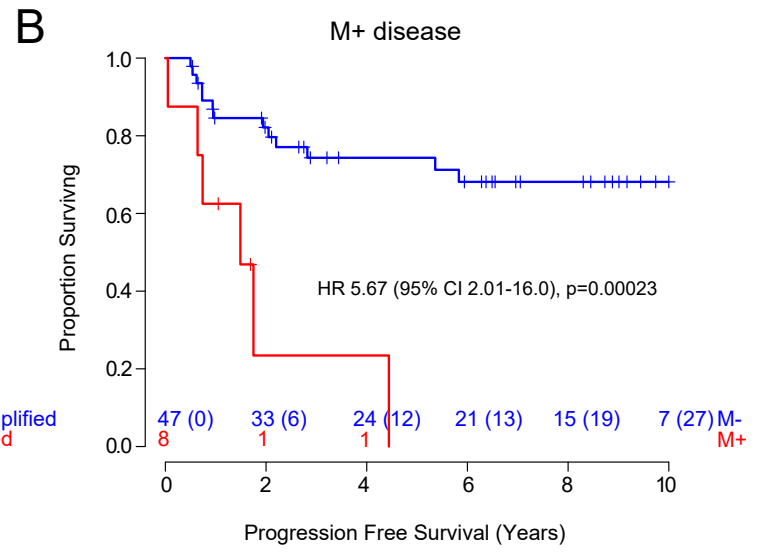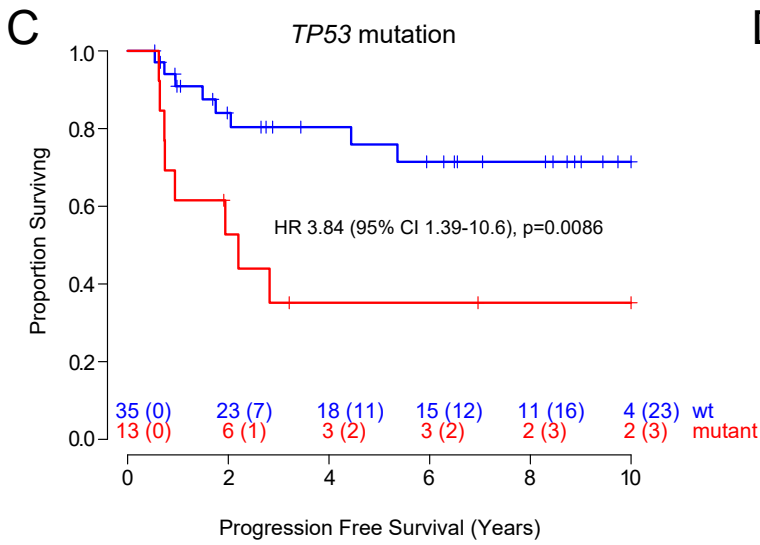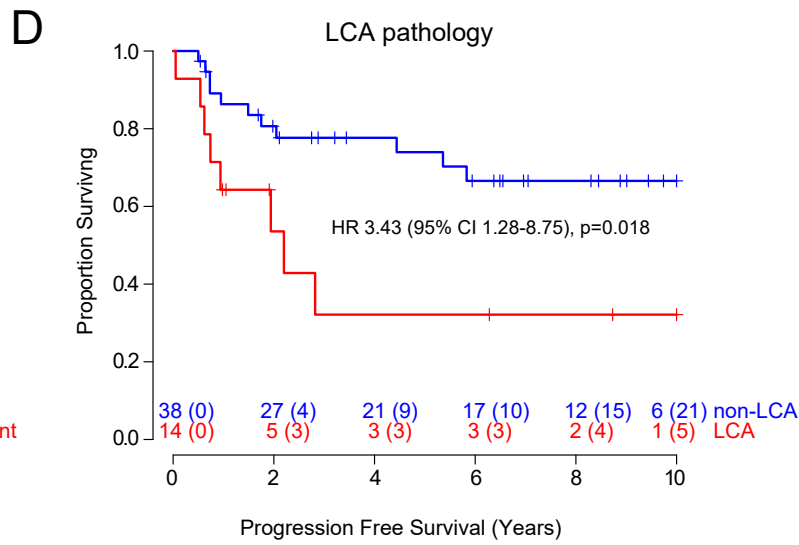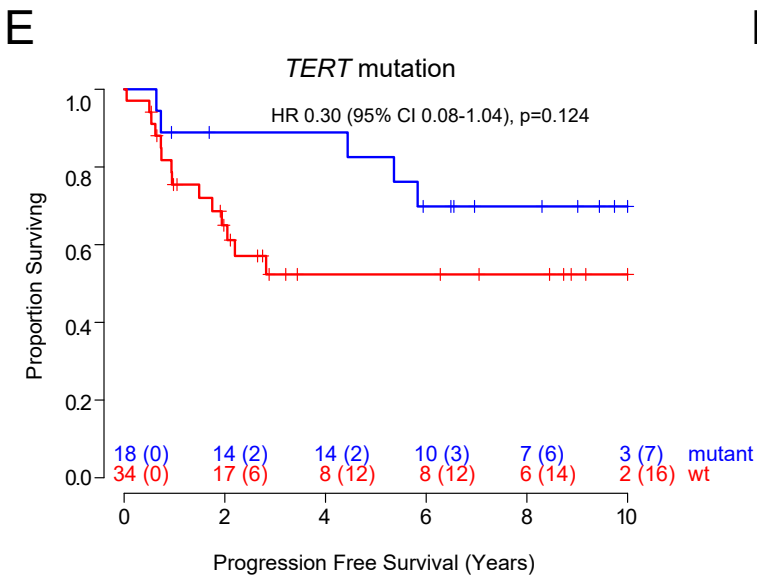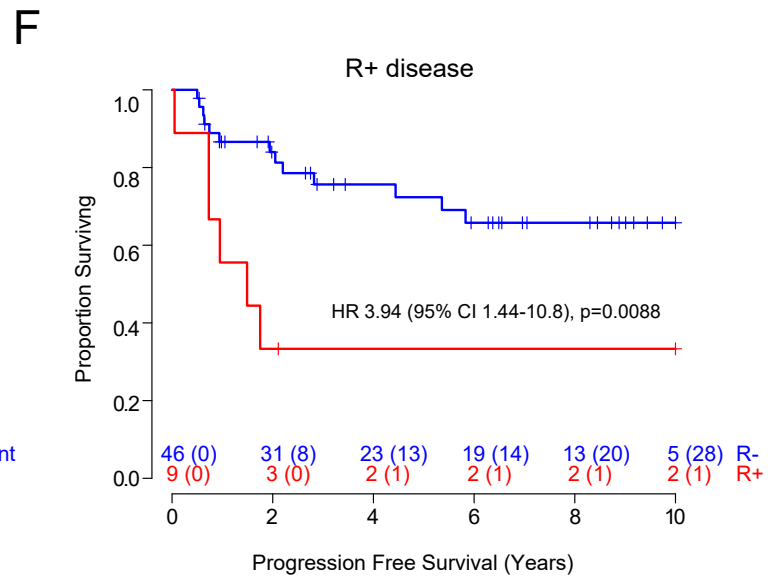

**Supplementary Figure 5. Investigation of the prognostic significance of disease features in MB<sub>SHH-Child</sub> medulloblastoma. A-F.** Kaplan-Meier plots, log-rank tests, HR and 95% CIs and at-risk tables (numbers censored in parentheses) are shown for *MYCN* amplification, M+ disease, *TP53* mutation, LCA pathology, *TERT* mutation and R+ disease in expanded, CSI-irradiated MB<sub>SHH-Child</sub> cohort (n=55). Abbreviations used: M+, metastatic disease; LCA, large cell/anaplastic; R+, residual disease.



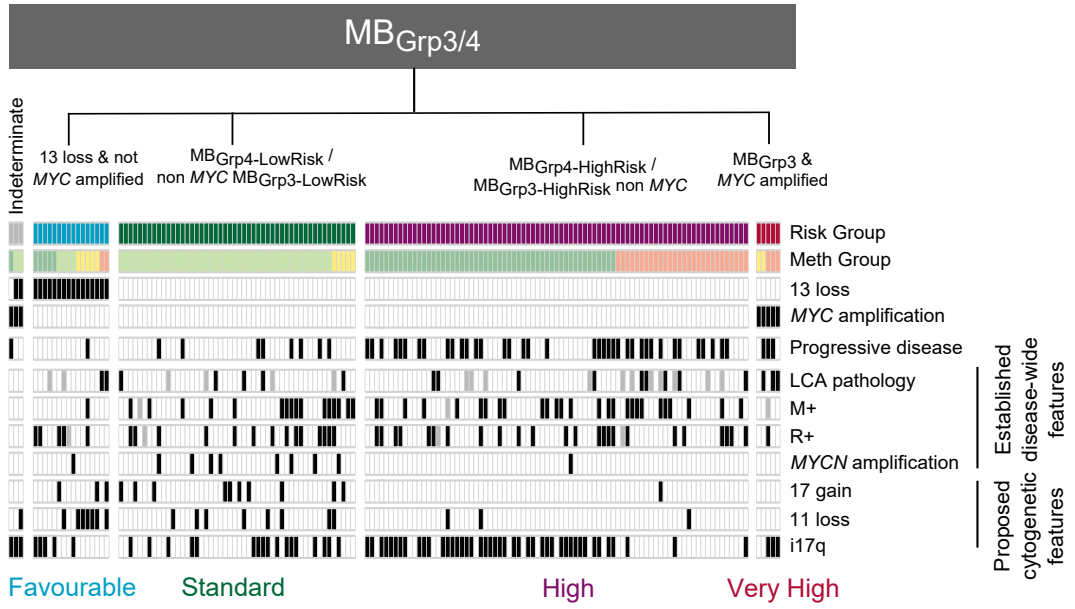

**Supplementary Figure 6. A novel risk stratification scheme for non-MB<sub>SHH</sub>/non-MB<sub>WNT</sub> medulloblastoma.**

A novel, empirically-derived survival model for risk stratification of childhood MB<sub>Grp3</sub> and MB<sub>Grp4</sub> medulloblastoma. Stratification markers are colour coded – Meth group – MB<sub>Grp3-HR</sub>, peach; MB<sub>Grp3-LR</sub>, yellow; MB<sub>Grp4-HR</sub>, darker green; MB<sub>Grp4-LR</sub>, green. 13 loss – presence, black; absence, white. *MYC* - presence, black; absence, white. Established prognostic features identified in disease-wide studies are also shown, in addition to reported cytogenetic prognostic markers (presence, black; absence, white; grey, no data)<sup>21</sup>.

**A**

| Covariate                  | n   | HR   | MB <sub>Grp4</sub> Univariate |        | Cross-validated multivariate (n=97) |           |        |
|----------------------------|-----|------|-------------------------------|--------|-------------------------------------|-----------|--------|
|                            |     |      | 95%CI                         | p      | HR                                  | 95%CI     | p      |
| 7q gain                    | 112 | 0.39 | 0.19-0.82                     | 0.012  | 0.34                                | 0.16-0.72 | 0.0054 |
| M+ disease                 | 116 | 2.63 | 1.31-5.29                     | 0.0066 | 2.64                                | 1.31-5.33 | 0.0068 |
| Male gender                | 118 | 2.62 | 1.09-6.33                     | 0.032  |                                     |           |        |
| High risk methylomic group | 118 | 3.11 | 1.45-6.64                     | 0.0034 |                                     |           |        |
| R+ disease                 | 115 | 1.40 | 0.70-2.78                     | 0.34   |                                     |           |        |
| LCA pathology              | 108 | 0.67 | 0.16-2.78                     | 0.58   |                                     |           |        |
| MYCN amplification         | 117 | 1.09 | 0.33-3.57                     | 0.88   |                                     |           |        |
| 11 loss*                   | 112 | 0.68 | 0.21-2.23                     | 0.53   |                                     |           |        |
| 17 gain*                   | 112 | NA   | NA                            | 0.031* |                                     |           |        |

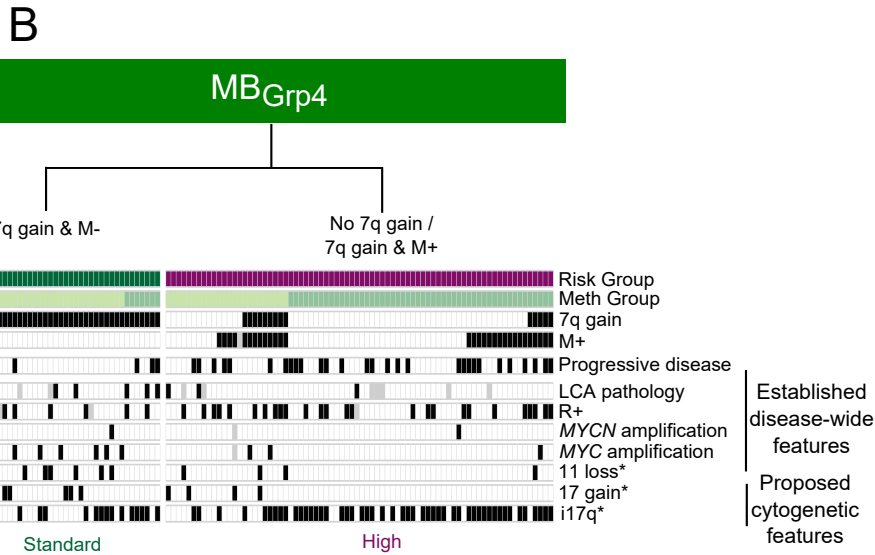

**E**

| Covariate                  | n  | HR   | MB <sub>Grp3</sub> Univariate |         | Cross-validated multivariate (n=36) |          |         |
|----------------------------|----|------|-------------------------------|---------|-------------------------------------|----------|---------|
|                            |    |      | 95%CI                         | p       | HR                                  | 95%CI    | p       |
| MYC amplification          | 56 | 25.1 | 3.92-161                      | 0.00067 | 25.1                                | 3.92-161 | 0.00067 |
| 13q loss                   | 46 | 0.19 | 0.03-1.47                     | 0.11    |                                     |          |         |
| i17q                       | 46 | 1.83 | 0.60-5.58                     | 0.29    |                                     |          |         |
| High risk methylomic group | 57 | 4.56 | 1.07-19.4                     | 0.040   |                                     |          |         |
| M+ disease                 | 55 | 1.11 | 0.37-2.18                     | 0.82    |                                     |          |         |
| LCA pathology              | 49 | 1.22 | 0.45-3.35                     | 0.69    |                                     |          |         |
| Male gender                | 57 | 0.79 | 0.34-1.82                     | 0.58    |                                     |          |         |
| R+ disease                 | 56 | 1.14 | 0.48-2.71                     | 0.77    |                                     |          |         |

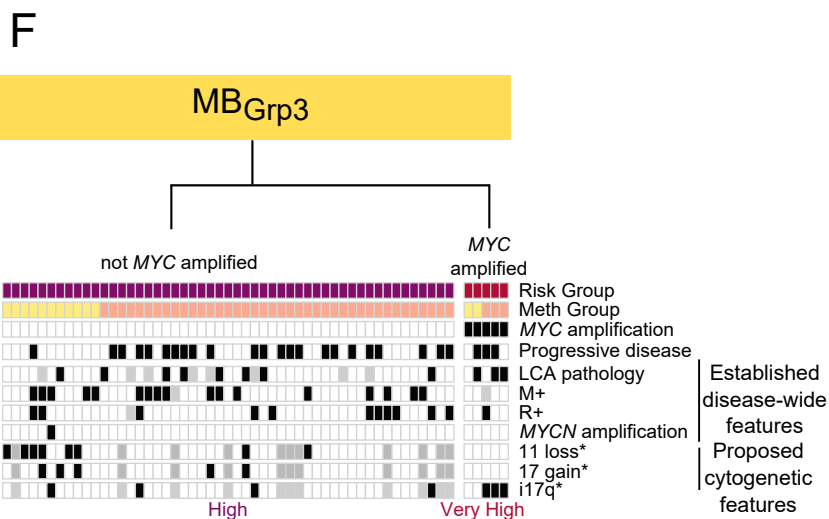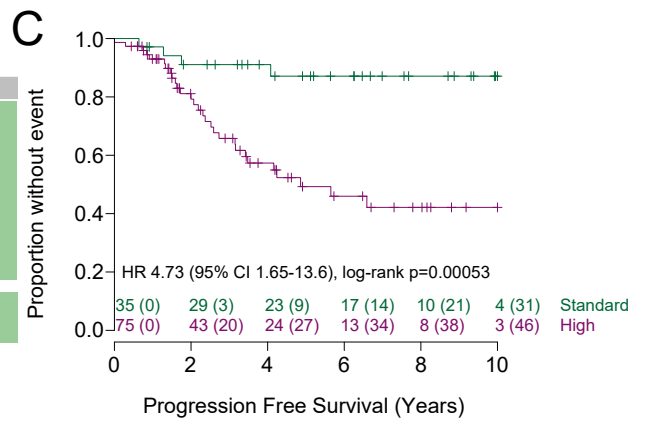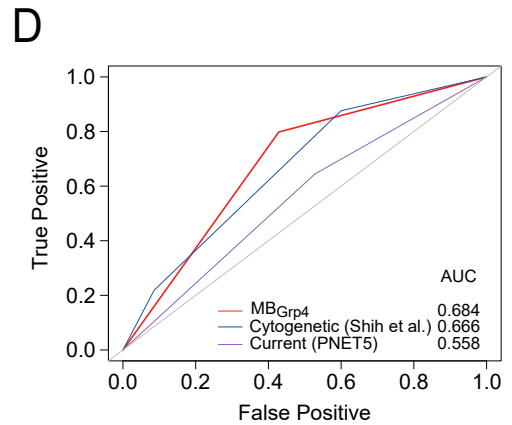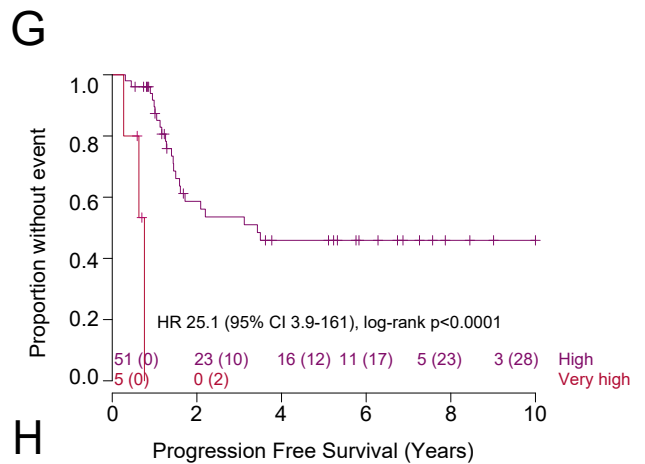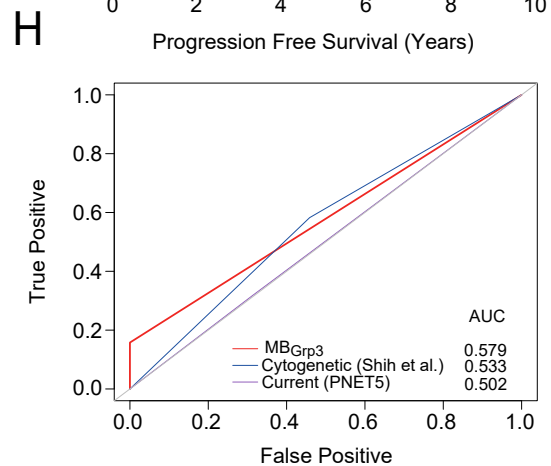

**Supplementary Figure 7. Prognostication within MB<sub>Grp3</sub> or MB<sub>Grp4</sub> only cohorts.** **A, E.** Identification of prognostic survival markers in combined non-infant MB<sub>Grp4</sub> (A, n=118) and MB<sub>Grp3</sub> (E, n=56) medulloblastomas. For each marker, hazard ratio, 95% confidence intervals and p values from Cox Proportional Hazards models are shown. Survival markers that are prognostic in a multivariate survival model are also shown, in addition to reported cytogenetic prognostic markers<sup>21</sup>, marked with an asterisk. <sup>†</sup>No events were observed in MB<sub>Grp4</sub> patients with chromosome 17 gain, so p value from log-rank test is given. **B.** A novel survival model for risk stratification of childhood MB<sub>Grp4</sub> medulloblastoma (n=113). Stratification markers are colour coded: Risk group – MB<sub>Grp4</sub>-HR, darker green; MB<sub>Grp4</sub>-LR, green. 7q gain – presence, black; absence, white. M+ disease – presence, black; absence, white. Established prognostic features identified in disease-wide studies are also shown, in addition to reported cytogenetic prognostic markers<sup>21</sup>. **C.** Progression free survival curves for risk stratified childhood MB<sub>Grp4</sub> medulloblastoma using scheme outlined in part B. At risk table (numbers censored in parentheses) is shown. **D, H.** Time-dependent ROC curves at 60 months demonstrate performance of novel stratification scheme in MB<sub>Grp4</sub> (D) and MB<sub>Grp3</sub> (H) compared to cytogenetic and SIOP-PNET5-MB risk stratifications. **F.** A novel survival model for risk stratification of childhood MB<sub>Grp3</sub> medulloblastoma (n=56). Stratification markers are colour coded: Meth group – MB<sub>Grp3</sub>-HR, peach; MB<sub>Grp3</sub>-LR, yellow. *MYC* amplification – presence, black; absence, white. Established prognostic features identified in disease-wide studies are also shown, in addition to reported cytogenetic prognostic markers<sup>21</sup>. **G.** Progression free survival curves for risk stratified MB<sub>Grp3</sub> medulloblastoma using scheme outlined in part F. At risk table (numbers censored in parentheses) is shown. Abbreviations used: M+, metastatic disease; LCA, large cell/anaplastic; R+, residual disease.

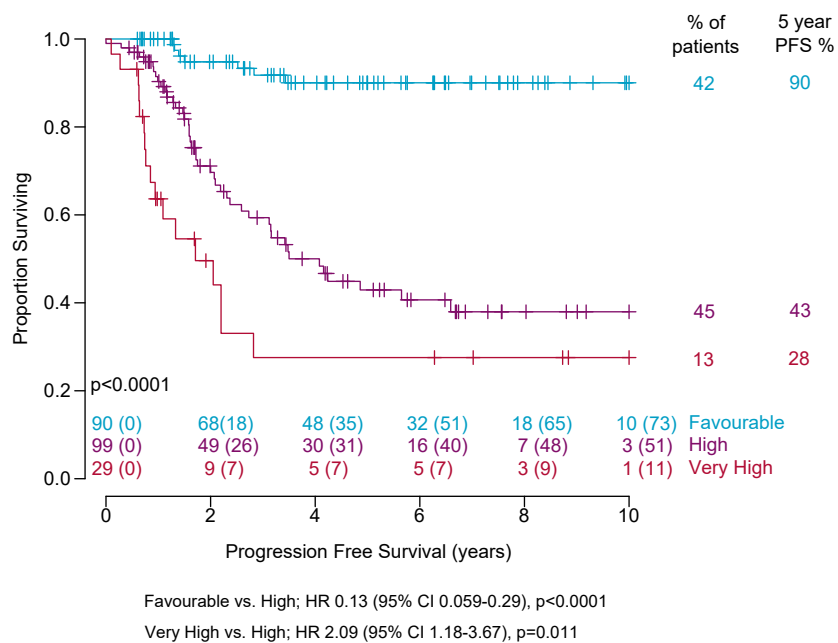

**Supplementary Figure 8.** Refinement of risk stratification of childhood medulloblastoma, by reclassification of MB<sub>GTP4-LR</sub> and non-MYC amplified MB<sub>GTP3-LR</sub> into favorable and high risk groups, by metastatic stage.

| <b>Subgroup</b>             | <b>Deaths &lt;5 years (%)</b> | <b>Deaths ≥5 years (%)</b> |
|-----------------------------|-------------------------------|----------------------------|
| MB <sub>WNT</sub>           | 1 (50%)                       | 1 (50%)                    |
| MB <sub>SHH-Child</sub>     | 11 (92%)                      | 1 (8%)                     |
| MB <sub>SHH-Infant</sub>    | 20 (95%)                      | 1 (5%)                     |
| MB <sub>Grp4-HighRisk</sub> | 18 (64%)                      | 10 (36%)                   |
| MB <sub>Grp4-LowRisk</sub>  | 11 (85%)                      | 2 (15%)                    |
| MB <sub>Grp3-Lowrisk</sub>  | 11 (100%)                     | 0 (0%)                     |
| MB <sub>Grp3-HighRisk</sub> | 33 (92%)                      | 3 (8%)                     |

**Supplementary Table 1. Characterisation of patterns of late death and progression in novel medulloblastoma subgroups.** For each identified subgroup, the number of deaths before and after 5 years is indicated.

## Discovery Cohort (Total n = 428)

Demethylated in MB<sub>WNT</sub> vs normal cerebella

| Pathway ID    | Pathway                                 | Total n | no. hypo-methylated | P       | AdjP    |
|---------------|-----------------------------------------|---------|---------------------|---------|---------|
| path:hsa04740 | Olfactory transduction                  | 357     | 82                  | 1.3E-49 | 4.2E-47 |
| path:hsa01100 | Metabolic pathways                      | 1178    | 142                 | 2.5E-43 | 3.9E-41 |
| path:hsa04080 | Neuroactive ligand-receptor interaction | 255     | 43                  | 9.7E-19 | 1.0E-16 |
| path:hsa04022 | cGMP-PKG signaling pathway              | 162     | 32                  | 1.3E-14 | 9.9E-13 |
| path:hsa04261 | Adrenergic signaling in cardiomyocytes  | 144     | 30                  | 1.9E-14 | 1.2E-12 |
| path:hsa04151 | PI3K-Akt signaling pathway              | 314     | 44                  | 4.7E-14 | 2.4E-12 |
| path:hsa04270 | Vascular smooth muscle contraction      | 117     | 26                  | 7.1E-14 | 2.9E-12 |
| path:hsa04020 | Calcium signaling pathway               | 171     | 32                  | 7.5E-14 | 2.9E-12 |
| path:hsa04530 | Tight junction                          | 133     | 28                  | 1.0E-13 | 3.5E-12 |
| path:hsa04014 | Ras signaling pathway                   | 219     | 36                  | 1.2E-13 | 3.6E-12 |
| path:hsa04024 | cAMP signaling pathway                  | 192     | 33                  | 1.6E-13 | 4.4E-12 |
| path:hsa04640 | Hematopoietic cell lineage              | 88      | 20                  | 3.2E-12 | 8.3E-11 |
| path:hsa04621 | NOD-like receptor signaling pathway     | 150     | 24                  | 4.3E-11 | 1.0E-09 |
| path:hsa00230 | Purine metabolism                       | 164     | 26                  | 5.8E-11 | 1.3E-09 |
| path:hsa04925 | Aldosterone synthesis and secretion     | 80      | 20                  | 7.5E-11 | 1.5E-09 |
| path:hsa04514 | Cell adhesion molecules (CAMs)          | 133     | 24                  | 9.8E-11 | 1.9E-09 |
| path:hsa05016 | Huntington's disease                    | 179     | 26                  | 1.6E-10 | 3.0E-09 |
| path:hsa05150 | Staphylococcus aureus infection         | 47      | 14                  | 2.3E-10 | 3.9E-09 |
| path:hsa05202 | Transcriptional misregulation in cancer | 165     | 27                  | 2.8E-10 | 4.5E-09 |
| path:hsa04972 | Pancreatic secretion                    | 89      | 19                  | 3.3E-10 | 5.1E-09 |

Demethylated in MB<sub>SHH-Child</sub> vs MB<sub>SHH-Infant</sub>

| Pathway ID    | Pathway                                   | Total n | no. hypo-methylated | P       | AdjP    |
|---------------|-------------------------------------------|---------|---------------------|---------|---------|
| path:hsa04740 | Olfactory transduction                    | 357     | 22                  | 2.7E-19 | 8.5E-17 |
| path:hsa05206 | MicroRNAs in cancer                       | 279     | 8                   | 1.3E-05 | 0.0020  |
| path:hsa04014 | Ras signaling pathway                     | 219     | 6                   | 0.0001  | 0.0124  |
| path:hsa05152 | Tuberculosis                              | 156     | 5                   | 0.0002  | 0.0124  |
| path:hsa04974 | Protein digestion and absorption          | 78      | 4                   | 0.0002  | 0.0136  |
| path:hsa01521 | EGFR tyrosine kinase inhibitor resistance | 79      | 4                   | 0.0003  | 0.0136  |
| path:hsa05146 | Amoebiasis                                | 93      | 4                   | 0.0003  | 0.0146  |
| path:hsa05200 | Pathways in cancer                        | 386     | 7                   | 0.0004  | 0.0172  |
| path:hsa04151 | PI3K-Akt signaling pathway                | 314     | 6                   | 0.0009  | 0.0305  |
| path:hsa04145 | Phagosome                                 | 137     | 4                   | 0.0013  | 0.0393  |
| path:hsa00770 | Pantothenate and CoA biosynthesis         | 18      | 2                   | 0.0015  | 0.0412  |
| path:hsa04512 | ECM-receptor interaction                  | 80      | 3                   | 0.0031  | 0.0790  |
| path:hsa04658 | Th1 and Th2 cell differentiation          | 88      | 3                   | 0.0038  | 0.0905  |
| path:hsa04925 | Aldosterone synthesis and secretion       | 80      | 3                   | 0.0043  | 0.0937  |
| path:hsa05310 | Asthma                                    | 27      | 2                   | 0.0048  | 0.0937  |
| path:hsa04211 | Longevity regulating pathway              | 93      | 3                   | 0.0048  | 0.0937  |
| path:hsa04320 | Dorso-ventral axis formation              | 28      | 2                   | 0.0056  | 0.0984  |
| path:hsa00380 | Tryptophan metabolism                     | 37      | 2                   | 0.0057  | 0.0984  |
| path:hsa05143 | African trypanosomiasis                   | 34      | 2                   | 0.0062  | 0.1014  |
| path:hsa04919 | Thyroid hormone signaling pathway         | 114     | 3                   | 0.0086  | 0.1286  |

Demethylated in MB<sub>SHH-Infant</sub> vs MB<sub>SHH-Child</sub>

| Pathway ID    | Pathway                                                  | Total n | no. hypo-methylated | P       | AdjP    |
|---------------|----------------------------------------------------------|---------|---------------------|---------|---------|
| path:hsa04080 | Neuroactive ligand-receptor interaction                  | 255     | 24                  | 1.6E-18 | 5.0E-16 |
| path:hsa05202 | Transcriptional misregulation in cancer                  | 165     | 18                  | 6.3E-13 | 9.8E-11 |
| path:hsa01100 | Metabolic pathways                                       | 1178    | 33                  | 5.8E-10 | 5.1E-08 |
| path:hsa04390 | Hippo signaling pathway                                  | 150     | 15                  | 6.6E-10 | 5.1E-08 |
| path:hsa04724 | Glutamatergic synapse                                    | 113     | 13                  | 9.6E-10 | 6.0E-08 |
| path:hsa05034 | Alcoholism                                               | 164     | 13                  | 2.1E-09 | 1.1E-07 |
| path:hsa04950 | Maturity onset diabetes of the young                     | 26      | 7                   | 6.3E-09 | 2.8E-07 |
| path:hsa04723 | Retrograde endocannabinoid signaling                     | 96      | 11                  | 1.2E-08 | 4.5E-07 |
| path:hsa04020 | Calcium signaling pathway                                | 171     | 13                  | 7.2E-08 | 2.1E-06 |
| path:hsa05322 | Systemic lupus erythematosus                             | 113     | 9                   | 7.4E-08 | 2.1E-06 |
| path:hsa04550 | Signaling pathways regulating pluripotency of stem cells | 138     | 12                  | 7.6E-08 | 2.1E-06 |
| path:hsa04727 | GABAergic synapse                                        | 83      | 9                   | 5.3E-07 | 1.4E-05 |
| path:hsa04024 | cAMP signaling pathway                                   | 192     | 12                  | 1.1E-06 | 2.7E-05 |
| path:hsa05224 | Breast cancer                                            | 143     | 11                  | 1.9E-06 | 3.7E-05 |
| path:hsa04916 | Melanogenesis                                            | 101     | 9                   | 1.9E-06 | 3.7E-05 |
| path:hsa04060 | Cytokine-cytokine receptor interaction                   | 233     | 10                  | 1.9E-06 | 3.7E-05 |
| path:hsa05033 | Nicotine addiction                                       | 36      | 6                   | 3.1E-06 | 5.6E-05 |
| path:hsa05217 | Basal cell carcinoma                                     | 55      | 7                   | 6.2E-06 | 0.00011 |
| path:hsa04726 | Serotonergic synapse                                     | 107     | 8                   | 7.9E-06 | 0.00013 |
| path:hsa05200 | Pathways in cancer                                       | 386     | 16                  | 1.1E-05 | 0.00016 |

Demethylated in MB<sub>Grp4-HR</sub> vs MB<sub>Grp4-LR</sub>

| Pathway ID    | Pathway                                 | Total n | no. hypo-methylated | P       | AdjP    |
|---------------|-----------------------------------------|---------|---------------------|---------|---------|
| path:hsa04151 | PI3K-Akt signaling pathway              | 314     | 21                  | 4.5E-11 | 1.4E-08 |
| path:hsa01100 | Metabolic pathways                      | 1178    | 30                  | 8.3E-09 | 1.3E-06 |
| path:hsa05200 | Pathways in cancer                      | 386     | 20                  | 3.3E-08 | 3.4E-06 |
| path:hsa04390 | Hippo signaling pathway                 | 150     | 13                  | 8.7E-08 | 5.6E-06 |
| path:hsa04261 | Adrenergic signaling in cardiomyocytes  | 144     | 12                  | 9.1E-08 | 5.6E-06 |
| path:hsa04152 | AMPK signaling pathway                  | 120     | 11                  | 3.1E-07 | 1.6E-05 |
| path:hsa04020 | Calcium signaling pathway               | 171     | 12                  | 7.8E-07 | 3.5E-05 |
| path:hsa05206 | MicroRNAs in cancer                     | 279     | 13                  | 1.0E-06 | 3.9E-05 |
| path:hsa04974 | Protein digestion and absorption        | 78      | 8                   | 2.1E-06 | 7.3E-05 |
| path:hsa04360 | Axon guidance                           | 170     | 12                  | 6.9E-06 | 0.0002  |
| path:hsa05414 | Dilated cardiomyopathy                  | 86      | 8                   | 7.5E-06 | 0.0002  |
| path:hsa04015 | Rap1 signaling pathway                  | 208     | 12                  | 7.9E-06 | 0.0002  |
| path:hsa04918 | Thyroid hormone synthesis               | 72      | 7                   | 1.5E-05 | 0.0004  |
| path:hsa04340 | Hedgehog signaling pathway              | 46      | 6                   | 2.2E-05 | 0.0005  |
| path:hsa05202 | Transcriptional misregulation in cancer | 165     | 10                  | 3.2E-05 | 0.0006  |
| path:hsa04922 | Glucagon signaling pathway              | 96      | 7                   | 3.2E-05 | 0.0006  |
| path:hsa04062 | Chemokine signaling pathway             | 178     | 9                   | 4.0E-05 | 0.0007  |
| path:hsa04512 | ECM-receptor interaction                | 80      | 7                   | 5.2E-05 | 0.0009  |
| path:hsa04310 | Wnt signaling pathway                   | 138     | 9                   | 5.4E-05 | 0.0009  |
| path:hsa05162 | Measles                                 | 115     | 7                   | 6.3E-05 | 0.0010  |

Demethylated in MB<sub>Grp3-HR</sub> vs MB<sub>Grp3-LR</sub>

| Pathway ID    | Pathway                                 | Total n | no. hypo-methylated | P       | AdjP    |
|---------------|-----------------------------------------|---------|---------------------|---------|---------|
| path:hsa01100 | Metabolic pathways                      | 1178    | 89                  | 5.7E-32 | 1.8E-29 |
| path:hsa04151 | PI3K-Akt signaling pathway              | 314     | 46                  | 1.5E-24 | 2.4E-22 |
| path:hsa05200 | Pathways in cancer                      | 386     | 49                  | 1.5E-22 | 1.6E-20 |
| path:hsa04810 | Regulation of actin cytoskeleton        | 202     | 34                  | 4.6E-20 | 3.5E-18 |
| path:hsa04510 | Focal adhesion                          | 193     | 30                  | 3.4E-16 | 2.1E-14 |
| path:hsa04080 | Neuroactive ligand-receptor interaction | 255     | 29                  | 2.7E-15 | 1.4E-13 |
| path:hsa04024 | cAMP signaling pathway                  | 192     | 26                  | 1.0E-13 | 4.5E-12 |
| path:hsa04014 | Ras signaling pathway                   | 219     | 27                  | 7.3E-13 | 2.8E-11 |
| path:hsa04015 | Rap1 signaling pathway                  | 208     | 26                  | 2.8E-12 | 9.4E-11 |
| path:hsa04010 | MAPK signaling pathway                  | 244     | 28                  | 3.0E-12 | 9.4E-11 |
| path:hsa04020 | Calcium signaling pathway               | 171     | 23                  | 7.6E-12 | 2.1E-10 |
| path:hsa04360 | Axon guidance                           | 170     | 24                  | 2.3E-11 | 6.1E-10 |
| path:hsa04060 | Cytokine-cytokine receptor interaction  | 233     | 21                  | 5.7E-11 | 1.2E-09 |
| path:hsa05146 | Amoebiasis                              | 93      | 16                  | 6.0E-11 | 1.2E-09 |
| path:hsa05205 | Proteoglycans in cancer                 | 200     | 24                  | 6.1E-11 | 1.2E-09 |
| path:hsa00230 | Purine metabolism                       | 164     | 20                  | 6.3E-11 | 1.2E-09 |
| path:hsa05202 | Transcriptional misregulation in cancer | 165     | 21                  | 3.0E-10 | 5.5E-09 |
| path:hsa04062 | Chemokine signaling pathway             | 178     | 20                  | 3.8E-10 | 6.6E-09 |
| path:hsa04514 | Cell adhesion molecules (CAMs)          | 133     | 18                  | 5.0E-10 | 7.8E-09 |
| path:hsa04512 | ECM-receptor interaction                | 80      | 15                  | 5.0E-10 | 7.8E-09 |



Validation Cohort (Hovestadt *et al.*) (Total n = 276)Demethylated in MB<sub>WNT</sub> vs normal cerebella

| Pathway ID    | Pathway                                 | Total n | no. hypo-methylated | P       | AdjP    |
|---------------|-----------------------------------------|---------|---------------------|---------|---------|
| path:hsa04151 | PI3K-Akt signaling pathway              | 314     | 21                  | 4.5E-11 | 1.4E-08 |
| path:hsa01100 | Metabolic pathways                      | 1178    | 30                  | 8.3E-09 | 1.3E-06 |
| path:hsa05200 | Pathways in cancer                      | 386     | 20                  | 3.3E-08 | 3.4E-06 |
| path:hsa04390 | Hippo signaling pathway                 | 150     | 13                  | 8.7E-08 | 5.6E-06 |
| path:hsa04261 | Adrenergic signaling in cardiomyocytes  | 144     | 12                  | 9.1E-08 | 5.6E-06 |
| path:hsa04152 | AMPK signaling pathway                  | 120     | 11                  | 3.1E-07 | 1.6E-05 |
| path:hsa04020 | Calcium signaling pathway               | 171     | 12                  | 7.8E-07 | 3.5E-05 |
| path:hsa05206 | MicroRNAs in cancer                     | 279     | 13                  | 1.0E-06 | 3.9E-05 |
| path:hsa04974 | Protein digestion and absorption        | 78      | 8                   | 2.1E-06 | 7.3E-05 |
| path:hsa04360 | Axon guidance                           | 170     | 12                  | 6.9E-06 | 0.0002  |
| path:hsa05414 | Dilated cardiomyopathy                  | 86      | 8                   | 7.5E-06 | 0.0002  |
| path:hsa04015 | Rap1 signaling pathway                  | 208     | 12                  | 7.9E-06 | 0.0002  |
| path:hsa04918 | Thyroid hormone synthesis               | 72      | 7                   | 1.5E-05 | 0.0004  |
| path:hsa04340 | Hedgehog signaling pathway              | 46      | 6                   | 2.2E-05 | 0.0005  |
| path:hsa05202 | Transcriptional misregulation in cancer | 165     | 10                  | 3.2E-05 | 0.0006  |
| path:hsa04922 | Glucagon signaling pathway              | 96      | 7                   | 3.2E-05 | 0.0006  |
| path:hsa04062 | Chemokine signaling pathway             | 178     | 9                   | 4.0E-05 | 0.0007  |
| path:hsa04512 | ECM-receptor interaction                | 80      | 7                   | 5.2E-05 | 0.0009  |
| path:hsa04310 | Wnt signaling pathway                   | 138     | 9                   | 5.4E-05 | 0.0009  |
| path:hsa05162 | Measles                                 | 115     | 7                   | 6.3E-05 | 0.0010  |

Demethylated in MB<sub>SHH-Child</sub> vs MB<sub>SHH-Infant</sub>

| Pathway ID    | Pathway                                     | Total n | no. hypo-methylated | P       | AdjP   |
|---------------|---------------------------------------------|---------|---------------------|---------|--------|
| path:hsa04740 | Olfactory transduction                      | 357     | 16                  | 0       | 0      |
| path:hsa05332 | Graft-versus-host disease                   | 36      | 3                   | 0.00007 | 0.0111 |
| path:hsa04612 | Antigen processing and presentation         | 61      | 3                   | 0.00024 | 0.0247 |
| path:hsa04145 | Phagosome                                   | 137     | 3                   | 0.00202 | 0.1560 |
| path:hsa05152 | Tuberculosis                                | 156     | 3                   | 0.00252 | 0.1560 |
| path:hsa05202 | Transcriptional misregulation in cancer     | 165     | 3                   | 0.00339 | 0.1750 |
| path:hsa05150 | Staphylococcus aureus infection             | 47      | 2                   | 0.00417 | 0.1802 |
| path:hsa05200 | Pathways in cancer                          | 386     | 4                   | 0.00470 | 0.1802 |
| path:hsa05140 | Leishmaniasis                               | 63      | 2                   | 0.00523 | 0.1802 |
| path:hsa04610 | Complement and coagulation cascades         | 74      | 2                   | 0.00828 | 0.2567 |
| path:hsa05166 | HTLV-I infection                            | 250     | 3                   | 0.00927 | 0.2611 |
| path:hsa04974 | Protein digestion and absorption            | 78      | 2                   | 0.01087 | 0.2808 |
| path:hsa05322 | Systemic lupus erythematosus                | 113     | 2                   | 0.01612 | 0.3845 |
| path:hsa04650 | Natural killer cell mediated cytotoxicity   | 106     | 2                   | 0.01835 | 0.4062 |
| path:hsa04141 | Protein processing in endoplasmic reticulum | 159     | 2                   | 0.02283 | 0.4717 |
| path:hsa04261 | Adrenergic signaling in cardiomyocytes      | 144     | 2                   | 0.02772 | 0.5276 |
| path:hsa05168 | Herpes simplex infection                    | 162     | 2                   | 0.02893 | 0.5276 |
| path:hsa00515 | Mannose type O-glycan biosynthesis          | 22      | 1                   | 0.03388 | 0.5836 |
| path:hsa05203 | Viral carcinogenesis                        | 191     | 2                   | 0.04487 | 0.7321 |
| path:hsa00051 | Fructose and mannose metabolism             | 32      | 1                   | 0.05223 | 0.8038 |

Demethylated in MB<sub>SHH-Infant</sub> vs MB<sub>SHH-Child</sub>

| Pathway ID    | Pathway                                                  | Total n | no. hypo-methylated | P       | AdjP    |
|---------------|----------------------------------------------------------|---------|---------------------|---------|---------|
| path:hsa04080 | Neuroactive ligand-receptor interaction                  | 255     | 27                  | 5.4E-21 | 1.7E-18 |
| path:hsa05322 | Systemic lupus erythematosus                             | 113     | 13                  | 2.4E-12 | 3.7E-10 |
| path:hsa05034 | Alcoholism                                               | 164     | 16                  | 4.8E-12 | 4.9E-10 |
| path:hsa04550 | Signaling pathways regulating pluripotency of stem cells | 138     | 16                  | 2.7E-11 | 1.7E-09 |
| path:hsa04724 | Glutamatergic synapse                                    | 113     | 15                  | 2.7E-11 | 1.7E-09 |
| path:hsa05202 | Transcriptional misregulation in cancer                  | 165     | 17                  | 3.7E-11 | 1.9E-09 |
| path:hsa04950 | Maturity onset diabetes of the young                     | 26      | 8                   | 3.3E-10 | 1.5E-08 |
| path:hsa04020 | Calcium signaling pathway                                | 171     | 16                  | 4.7E-10 | 1.8E-08 |
| path:hsa05205 | Proteoglycans in cancer                                  | 200     | 17                  | 1.1E-09 | 3.6E-08 |
| path:hsa04723 | Retrograde endocannabinoid signaling                     | 96      | 12                  | 3.1E-09 | 9.6E-08 |
| path:hsa04060 | Cytokine-cytokine receptor interaction                   | 233     | 13                  | 6.3E-09 | 1.8E-07 |
| path:hsa05033 | Nicotine addiction                                       | 36      | 8                   | 1.4E-08 | 3.7E-07 |
| path:hsa04390 | Hippo signaling pathway                                  | 150     | 14                  | 2.4E-08 | 5.6E-07 |
| path:hsa04916 | Melanogenesis                                            | 101     | 11                  | 4.8E-08 | 1.1E-06 |
| path:hsa04024 | cAMP signaling pathway                                   | 192     | 14                  | 7.2E-08 | 1.5E-06 |
| path:hsa05200 | Pathways in cancer                                       | 386     | 20                  | 1.2E-07 | 2.3E-06 |
| path:hsa01100 | Metabolic pathways                                       | 1178    | 29                  | 9.2E-07 | 1.7E-05 |
| path:hsa05217 | Basal cell carcinoma                                     | 55      | 8                   | 1.0E-06 | 1.8E-05 |
| path:hsa05032 | Morphine addiction                                       | 88      | 9                   | 4.4E-06 | 7.2E-05 |
| path:hsa05224 | Breast cancer                                            | 143     | 11                  | 5.3E-06 | 8.2E-05 |

Demethylated in MB<sub>Grp4-HR</sub> vs MB<sub>Grp4-LR</sub>

| Pathway ID    | Pathway                                                  | Total n | no. hypo-methylated | P       | AdjP     |
|---------------|----------------------------------------------------------|---------|---------------------|---------|----------|
| path:hsa05202 | Transcriptional misregulation in cancer                  | 165     | 12                  | 4.3E-08 | 6.50E-06 |
| path:hsa04151 | PI3K-Akt signaling pathway                               | 314     | 15                  | 8.1E-08 | 6.50E-06 |
| path:hsa04310 | Wnt signaling pathway                                    | 138     | 11                  | 8.2E-08 | 6.50E-06 |
| path:hsa05200 | Pathways in cancer                                       | 386     | 17                  | 8.4E-08 | 6.50E-06 |
| path:hsa04916 | Melanogenesis                                            | 101     | 9                   | 2.5E-07 | 1.58E-05 |
| path:hsa04360 | Axon guidance                                            | 170     | 12                  | 4.4E-07 | 2.24E-05 |
| path:hsa04015 | Rap1 signaling pathway                                   | 208     | 12                  | 5.1E-07 | 2.24E-05 |
| path:hsa05034 | Alcoholism                                               | 164     | 9                   | 1.4E-06 | 5.25E-05 |
| path:hsa04390 | Hippo signaling pathway                                  | 150     | 10                  | 2.8E-06 | 9.72E-05 |
| path:hsa04014 | Ras signaling pathway                                    | 219     | 11                  | 3.7E-06 | 0.0001   |
| path:hsa01100 | Metabolic pathways                                       | 1178    | 21                  | 6.4E-06 | 0.0002   |
| path:hsa04724 | Glutamatergic synapse                                    | 113     | 8                   | 1.6E-05 | 0.0004   |
| path:hsa05206 | MicroRNAs in cancer                                      | 279     | 10                  | 1.7E-05 | 0.0004   |
| path:hsa05217 | Basal cell carcinoma                                     | 55      | 6                   | 2.1E-05 | 0.0005   |
| path:hsa04918 | Thyroid hormone synthesis                                | 72      | 6                   | 3.4E-05 | 0.0007   |
| path:hsa04550 | Signaling pathways regulating pluripotency of stem cells | 138     | 8                   | 4.2E-05 | 0.0008   |
| path:hsa04972 | Pancreatic secretion                                     | 89      | 6                   | 4.4E-05 | 0.0008   |
| path:hsa03320 | PPAR signaling pathway                                   | 69      | 5                   | 4.8E-05 | 0.0008   |
| path:hsa04713 | Circadian entrainment                                    | 95      | 7                   | 4.8E-05 | 0.0008   |
| path:hsa04150 | mTOR signaling pathway                                   | 150     | 8                   | 5.1E-05 | 0.0008   |

Demethylated in MB<sub>Grp3-HR</sub> vs MB<sub>Grp3-LR</sub>

| Pathway ID    | Pathway                                 | Total n | no. hypo-methylated | P       | AdjP    |
|---------------|-----------------------------------------|---------|---------------------|---------|---------|
| path:hsa01100 | Metabolic pathways                      | 1178    | 22                  | 1.2E-07 | 2.6E-05 |
| path:hsa04151 | PI3K-Akt signaling pathway              | 314     | 13                  | 1.7E-07 | 2.6E-05 |
| path:hsa04713 | Circadian entrainment                   | 95      | 8                   | 5.9E-07 | 6.1E-05 |
| path:hsa04014 | Ras signaling pathway                   | 219     | 10                  | 2.5E-06 | 0.0002  |
| path:hsa04024 | cAMP signaling pathway                  | 192     | 9                   | 4.8E-06 | 0.0003  |
| path:hsa04810 | Regulation of actin cytoskeleton        | 202     | 9                   | 1.0E-05 | 0.0005  |
| path:hsa05202 | Transcriptional misregulation in cancer | 165     | 8                   | 2.3E-05 | 0.0010  |
| path:hsa05321 | Inflammatory bowel disease (IBD)        | 61      | 5                   | 2.5E-05 | 0.0010  |
| path:hsa04010 | MAPK signaling pathway                  | 244     | 9                   | 5.5E-05 | 0.0019  |
| path:hsa00450 | Selenocompound metabolism               | 16      | 3                   | 6.1E-05 | 0.0019  |
| path:hsa04360 | Axon guidance                           | 170     | 8                   | 7.8E-05 | 0.0022  |
| path:hsa04611 | Platelet activation                     | 121     | 6                   | 0.0001  | 0.0027  |
| path:hsa04015 | Rap1 signaling pathway                  | 208     | 8                   | 0.0001  | 0.0027  |
| path:hsa04020 | Calcium signaling pathway               | 171     | 7                   | 0.0002  | 0.0039  |
| path:hsa04610 | Complement and coagulation cascades     | 74      | 4                   | 0.0002  | 0.0039  |
| path:hsa05152 | Tuberculosis                            | 156     | 6                   | 0.0002  | 0.0047  |
| path:hsa04530 | Tight junction                          | 133     | 6                   | 0.0003  | 0.0047  |
| path:hsa05200 | Pathways in cancer                      | 386     | 10                  | 0.0004  | 0.0064  |
| path:hsa04310 | Wnt signaling pathway                   | 138     | 6                   | 0.0005  | 0.0079  |
| path:hsa05205 | Proteoglycans in cancer                 | 200     | 7                   | 0.0006  | 0.0088  |

**Supplementary Table 2. Pathway enrichment analyses.** For each non-MB<sub>WNT</sub> subgroup, hypomethylated probes with beta change < -0.3 were identified in comparison with their established consensus subgroup counterpart and tested for pathway enrichment using the R package missMethyl. For MB<sub>WNT</sub>, comparisons were made against normal cerebella. The top 20 pathways are reported for analyses carried out on the discovery and validation cohorts. For MB<sub>Gp3-LR</sub> and MB<sub>Gp4-LR</sub>, no significant pathway enrichments were reported in either cohort, and are not shown here.
